# Supplementary material
Source: PubMed Central journal article supplement (PMC5125438)
Supplement: NIHMS823356-supplement-Supplemental.pdf [file NIHMS823356-supplement-Supplemental.pdf]

# Gargantulide A, a complex 52-membered macrolactone showing antibacterial activity from *Streptomyces* sp.

Jung-Rae Rho, Gurusamy Subramaniam, Hyukjae Choi, Eun-Hee Kim, Sok Peng Ng, K. Yoganathan, Siewbee Ng, Antony D. Buss, Mark S. Butler, William H. Gerwick

## Contents

|                                                                                                                                                                  |    |
|------------------------------------------------------------------------------------------------------------------------------------------------------------------|----|
| General Experimental Methods .....                                                                                                                               | 2  |
| Scheme S1. Preparation of the trimethylsilylimidazole derivative of D-glucose.....                                                                               | 4  |
| Table S1. <sup>1</sup> H and <sup>13</sup> C NMR data for gargantulide A ( <b>1</b> ) recorded in MeOH- <i>d</i> <sub>4</sub> .....                              | 5  |
| Table S2. MIC (μg/mL, n = 5 strains) ranges of gargantulide A ( <b>1</b> ) and comparator antibiotics against multi-drug resistant Gram-positive pathogens ..... | 6  |
| Figure S1. GC/MS analysis after additional acid hydrolysis and trimethylsilylation.....                                                                          | 7  |
| Figure S2. Application of Kishi's NMR database for the consecutive hydroxyl/methyl/hydroxyl/methyl substituents from C-42 to C-45. ....                          | 8  |
| Figure S3. <sup>1</sup> H NMR spectra of gargantulide A ( <b>1</b> ) at 500MHz (A) and 900 MHz (B).....                                                          | 9  |
| Figure S4. <sup>13</sup> C NMR spectrum of gargantulide A ( <b>1</b> ) at 900MHz. ....                                                                           | 10 |
| Figure S5. Expanded <sup>13</sup> C NMR spectrum of gargantulide A ( <b>1</b> ) at 900MHz. ....                                                                  | 11 |
| Figure S6. DQF-COSY NMR spectrum of gargantulide A ( <b>1</b> ) at 900MHz. ....                                                                                  | 12 |
| Figure S7. TOCSY spectrum of gargantulide A ( <b>1</b> ) at 500MHz. ....                                                                                         | 13 |
| Figure S8. Expanded TOCSY spectrum of gargantulide A ( <b>1</b> ) at 500MHz. ....                                                                                | 14 |
| Figure S9. Expanded TOCSY spectrum of gargantulide A ( <b>1</b> ) at 500MHz. ....                                                                                | 15 |
| Figure S10. HSQC spectrum of gargantulide A ( <b>1</b> ) [Red : CH <sub>2</sub> , Black: CH + CH <sub>3</sub> ] at 900 MHz.....                                  | 16 |
| Figure S11. Expanded HSQC spectrum of gargantulide A ( <b>1</b> ) [Red : CH <sub>2</sub> , Black: CH + CH <sub>3</sub> ] at 900 MHz.. ....                       | 17 |
| Figure S12. Expanded HSQC spectrum of gargantulide A ( <b>1</b> ) [Black : CH, Red: CH <sub>2</sub> ] at 900 MHz.....                                            | 18 |
| Figure S13. HSQC-TOCSY spectrum of gargantulide A ( <b>1</b> ) at 900 MHz. ....                                                                                  | 19 |
| Figure S14. Expanded HSQC-TOCSY spectrum of gargantulide A ( <b>1</b> ) at 900 MHz. ....                                                                         | 20 |
| Figure S15. HMBC spectrum of gargantulide A ( <b>1</b> ) at 900 MHz. ....                                                                                        | 21 |
| Figure S16. Expanded HMBC spectrum of gargantulide A ( <b>1</b> ) at 900 MHz. ....                                                                               | 22 |
| Figure S17. NOESY spectrum of gargantulide A ( <b>1</b> ) at 500 MHz. ....                                                                                       | 23 |
| Figure S18. Expanded NOESY spectrum of gargantulide A ( <b>1</b> ) at 500 MHz. ....                                                                              | 24 |
| Figure S19. Expanded NOESY spectrum of gargantulide A ( <b>1</b> ) at 500 MHz. ....                                                                              | 25 |

|                                                                            |    |
|----------------------------------------------------------------------------|----|
| Figure S20. Expanded NOESY spectrum of gargantulide A (1) at 500 MHz. .... | 26 |
| Figure S21. Expanded NOESY spectrum of gargantulide A (1) at 900 MHz. .... | 27 |
| Figure S22. HECADE spectrum of gargantulide A (1) at 900 MHz. ....         | 28 |

## General Experimental Method

### *General Instruments*

Optical rotation was measured on a JASCO P-1010 polarimeter with a 5 cm cell. IR spectra were recorded on a JASCO FT/IR 4100 spectrometer. All NMR spectra were measured on a Unity INOVA 500 and a Bruker Avance II 900 MHz spectrometers in a solvent of MeOH- $d_4$  in reference to residual solvent peaks at  $\delta_H$  3.30 and  $\delta_C$  49. High-resolution ESI –FT mass spectrum was acquired using a Thermo LTQ-XL Orbitrap. The HPLC was performed using an Agilent 1200 system using the YMC ODS-A column (10 × 250 mm, S-5 $\mu$ m). All solvents were distilled prior to use.

### *Biological Source Material*

**Strain ID:** A42983

**Taxonomy:** *Stretomyces* sp.

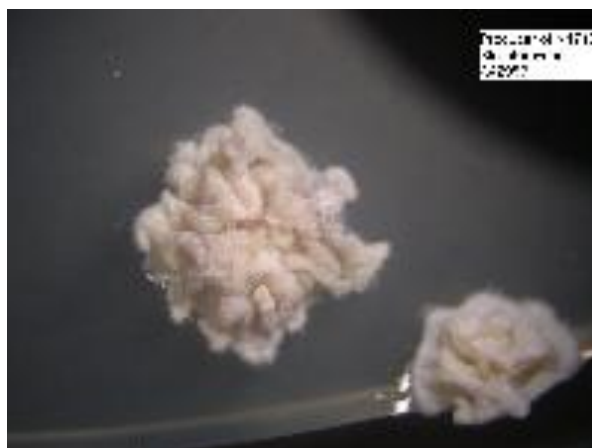

Strain A42983 was sub-cultured on ISP4 agar (Difco) for 10 days at 28 °C. The subculture was inoculated into 250 mL Erlenmeyer flasks, each containing 50 mL of seed medium, composed of 1.5% glucose (Sigma), 1.5% glycerol solution (Merck), 1.5% soya peptone (Oxoid), 0.1% CaCO<sub>3</sub> (BDH) and reverse osmosis water (1L). The pH of the medium was adjusted to 7 prior to sterilization (autoclave 121 °C for 20 min). The seed

culture was incubated for 3 days at 28 °C on a rotary shaker at 200 rpm and then inoculated into 250 mL Erlenmeyer flasks, each containing 50 mL of liquid medium. The liquid medium composed of 2.1% Mops, 0.1 % TES-1, 0.2% KH<sub>2</sub>PO<sub>4</sub>, 0.05% MgSO<sub>4</sub>, 0.1% NaCl, 0.5% CaCO<sub>3</sub>, 0.5% NH<sub>4</sub>Cl, 2% glycerol, 0.2% L-proline, reverse osmosis water (1L) and 2% glucose which was sterilized and added separately. The pH of the medium was adjusted to 7 prior to sterilization (autoclave 121 °C for 20 min). The fermentation was carried out for 14 days at 28°C at 200 rpm.

### ***Extraction and Isolation***

The culture broth (15 L) of *Streptomyces* sp A42983 was centrifuged to separate the mycelial cake and supernatant. The supernatant (12 L) was passed through a column packed with Waters Prep C18, 55-105 μm, 125 Å (Vacuum Liquid Chromatography). The column was eluted with mixtures of water and methanol, both containing 0.1% formic acid. The column was initially washed with 100% water, followed by stepped gradient elution with the solvent system of 10 to 100% MeOH/H<sub>2</sub>O to afford 10 fractions (1 L each), each of the fractions was analyzed by HR-ESI-MS (Bruker microQTOF). Fractions 5 – 8 (50% to 80% MeOH/H<sub>2</sub>O) containing gargantulide A were combined and concentrated under reduced pressure. The combined fraction was dissolved in MeOH and subjected to reverse phase preparative Gilson GX-281 HPLC [Waters NovaPak C-18 radial cartridge column, 6 μm, 40 × 100 mm; mobile phase: solvent A: H<sub>2</sub>O/formic acid (0.1%), solvent B: acetonitrile/formic acid (0.1%)] at a flow rate 18 mL/min with a mobile phase gradient of the solvent B from 15% to 23% in 10 min, 23% to 33% in 40 min to afford gargantulide A (1) (1.5 g, RT 29 min).

**Gargantulide A (1):** white powder, m.p.= 157 °C,  $[\alpha]_D^{25}$  -36.5 (*c* 0.30, MeOH); IR  $\nu_{\max}$  3331, 2933, 1715, 1588 and 1456 cm<sup>-1</sup>; <sup>1</sup>H and <sup>13</sup>C NMR data, see Table 1S; positive HR-ESI-FT-MS  $m/z$  = 1049.6974 for  $[M + 2H]^{2+}$  (Calcd for C<sub>105</sub>H<sub>202</sub>N<sub>2</sub>O<sub>38</sub>, 1049.6968).

### ***Determination of Absolute Configuration of Glucose and Mannose***

Purified glucose and mannose were each dissolved in 2 N trifluoroacetic acid and incubated at 110 °C for 24 h. The hydrolysate was dried under N<sub>2</sub> (g). The residue (0.5 mg) was resuspended in 0.1 mL of pyridine. To a solution of hydrolysate was add L-cysteine methyl ester hydrochloride in pyridine (0.1 M, 0.05 mL) and the reaction mixture was incubated at 60 °C for 2 h. Trimethylsilylimidazole solution (0.1 mL) was added to the reaction mixture and then incubated at 60 °C for 1.5 h. To this solution, 200 μL of hexanes

and 200  $\mu\text{L}$  of deionized water were added. The organic layer was injected into the GC-MS (DB-5MS, Agilent Technologies J&W Scientific, 30 m  $\times$  0.25 mm) under the following conditions: the initial oven temperature was 150  $^{\circ}\text{C}$ , held for 1 min, followed by a ramp from 150  $^{\circ}\text{C}$  to 250  $^{\circ}\text{C}$  at a rate of 2  $^{\circ}\text{C}/\text{min}$  and held at 250  $^{\circ}\text{C}$  for 10 min.

Authentic standards were also prepared by the same procedure. Retention times of the sugar derivatives: D-mannose derivative (36.43), L-mannose derivative (36.19), D-glucose derivative (36.39), L-glucose derivative (37.02), Natural mannose derivative (36.44), and natural glucose derivative (36.42)

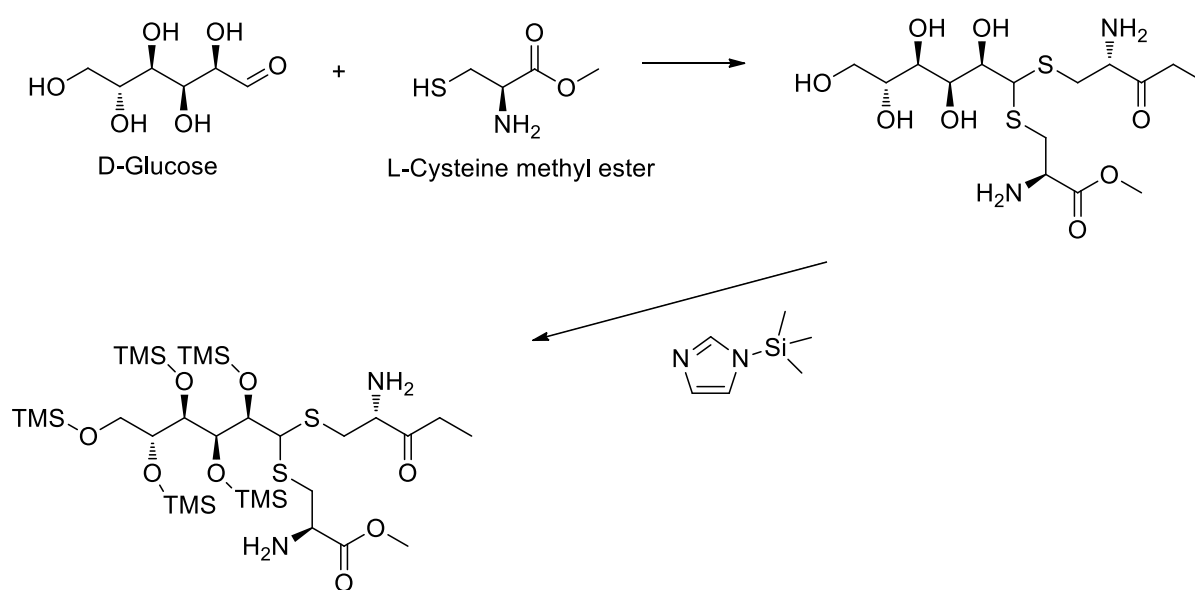

Scheme S1. Preparation of the trimethylsilylimidazole derivative of D-glucose.

**Table S1.**  $^1\text{H}$  and  $^{13}\text{C}$  NMR data for gargantulide A (**1**) recorded in  $\text{MeOH-}d_4$

| no   | $^1\text{H}$         | $^{13}\text{C}$      | no    | $^1\text{H}$         | $^{13}\text{C}$     |
|------|----------------------|----------------------|-------|----------------------|---------------------|
| 1    |                      | 175.1, C             | 45    | 4.21, m              | 72.5, $\text{CH}_2$ |
| 2    | 2.35, m              | 35.4, $\text{CH}_2$  | 46    | 1.56, m              | 40.4, CH            |
| 3    | 1.61, m              | 26.7, $\text{CH}_2$  | 47    | 4.05, m              | 71.42, CH           |
| 4    | a 1.32, m; b 1.42, m | 28.4, $\text{CH}_2$  | 48    | a 1.56, m; b 1.65, m | 38.0, $\text{CH}_2$ |
| 5    | a 1.19, m; b 1.48, m | 34.22, $\text{CH}_2$ | 49    | 3.67, m              | 76.9, CH            |
| 6    | 1.47, m              | 39.8, CH             | 50    | 2.30, m              | 38.3, CH            |
| Me-6 | 0.87, d              | 14.5, $\text{CH}_3$  | Me-50 | 0.92, d              | 10.7, $\text{CH}_3$ |

|       |                                                |                        |       |                      |                        |
|-------|------------------------------------------------|------------------------|-------|----------------------|------------------------|
| 7     | 3.41, m                                        | 76.1, CH               | 51    | 4.88, m              | 76.8, CH               |
| 8     | 1.44, m                                        | 32.7, CH <sub>2</sub>  | 52    | 1.51, m              | 40.87, CH              |
| 9     | a 1.38, m; 1.46, m                             | 32.4, CH <sub>2</sub>  | 53    | a 1.19, m; b 1.79, m | 24.5, CH <sub>2</sub>  |
| 10    | 1.64, m                                        | 36.1, CH               | 54    | a 1.43, m; b 1.88, m | 31.7, CH <sub>2</sub>  |
| Me-10 | 0.85, d                                        | 13.2, CH <sub>3</sub>  | 55    | 3.67, m              | 83.7, CH               |
| 11    | 3.11, dd(8.3, 2.1)                             | 79.9, CH               | 56    | 1.71, m              | 43.1, CH               |
| 12    | 1.54, m                                        | 37.5, CH               | Me-56 | 0.93, d              | 10.4, CH <sub>3</sub>  |
| Me-12 | 0.85, d                                        | 16.6, CH <sub>3</sub>  | 57    | 4.18, m              | 68.4, CH               |
| 13    | a 1.08, m; b 1.76, m                           | 34.01, CH <sub>2</sub> | 58    | a 1.41, m; b 1.67, m | 43.9, CH <sub>2</sub>  |
| 14    | a 1.21, m; b 1.49, m                           | 28.6, CH <sub>2</sub>  | 59    | 4.01, m              | 68.8, CH               |
| 15    | a 1.30, m; b 1.56, m                           | 27.1, CH <sub>2</sub>  | 60    | a 1.59, m; b 1.63, m | 45.6, CH               |
| 16    | a 1.32, m; b 1.59, m                           | 35.9, CH <sub>2</sub>  | 61    | 3.79, m              | 71.49, CH              |
| 17    | 3.59, m                                        | 74.7, CH               | 62    | a 1.42, m; b 1.52, m | 38.7, CH <sub>2</sub>  |
| 18    | 2.66, dd(6.8, 7.3)                             | 53.8, CH               | 63    | a 1.38, m; b 1.61, m | 22.7, CH <sub>2</sub>  |
| Me-18 | 0.98, d                                        | 13.5, CH <sub>3</sub>  | 64    | a 1.40, m; b 1.49, m | 38.5, CH <sub>2</sub>  |
| 19    |                                                | 214.4, C               | 65    | 3.49, m              | 72.8, CH               |
| 20    | a 2.81, dd(17.9, 6.6)<br>b 2.86, dd(17.9, 6.6) | 49.9, CH <sub>2</sub>  | 66    | a 1.36, m; b 1.51, m | 35.92, CH <sub>2</sub> |
| 21    | 4.46, d(6.6)                                   | 73.9, CH               | 67    | a 1.13, m; b 1.51, m | 34.04, CH <sub>2</sub> |
| 22    |                                                | 146.5, C               | 68    | 1.43, m              | 34.07, CH              |
| Me-22 | 1.77, s                                        | 11.8, CH <sub>3</sub>  | Me-68 | 0.91, d              | 20.1, CH <sub>3</sub>  |
| 23    | 5.21, d(9.8)                                   | 123.3, CH              | 69    | a 1.20, m; b 1.38, m | 37.6, CH <sub>2</sub>  |
| 24    | 4.80, dd(9.8, 8.3)                             | 75.7, CH               | 70    | a 1.38, m; b 1.44, m | 25.0, CH <sub>2</sub>  |
| 25    | 3.61, dd(8.3, 2.9)                             | 80.3, CH               | 71    | 1.62, m              | 29.0, CH <sub>2</sub>  |
| 26    | 1.73, m                                        | 39.2, CH <sub>2</sub>  | 72    | 2.91, t(7.7)         | 40.78, CH <sub>2</sub> |
| Me-26 | 1.06, d                                        | 11.7, CH <sub>3</sub>  | 1'    | a 1.07, m; b 1.35, m | 34.18, CH <sub>2</sub> |
| 27    | 4.10                                           | 69.6, CH               | 2'    | a 1.27, m; b 1.48, m | 21.5, CH <sub>2</sub>  |
| 28    | a 1.26, m; b 1.57, m                           | 43.8, CH <sub>2</sub>  | 3'    | 0.88, t(7.1)         | 14.7, CH <sub>3</sub>  |
| 29    | 3.69, m                                        | 69.0, CH               | Man-1 | 4.57, br s           | 96.8, CH               |
| 30    | a 1.41, m; b 1.44, m                           | 39.4, CH <sub>2</sub>  | Man-2 | 3.80, m              | 72.9, CH               |
| 31    | 1.50, m                                        | 23.2, CH <sub>2</sub>  | Man-3 | 3.45, m              | 75.2, CH               |
| 32    | a 1.43, m; b 1.49, m                           | 39.3, CH <sub>2</sub>  | Man-4 | 3.60, t(9.3)         | 68.6, CH               |
| 33    | 3.82, m                                        | 69.3, CH               | Man-5 | 3.15, m              | 78.5, CH               |
| 34    | a 1.48, m; b 1.56, m                           | 46.1, CH <sub>2</sub>  | Man-6 | a 3.74, m; b 3.87, m | 62.8, CH <sub>2</sub>  |
| 35    | 4.09, m                                        | 66.35, CH              | Glc-1 | 4.21, d(7.3)         | 102.3, CH              |
| 36    | 1.55, m                                        | 46.7, CH <sub>2</sub>  | Glc-2 | 3.18, m              | 74.8, CH               |
| 37    | 4.09, m                                        | 66.4, CH               | Glc-3 | 3.34, m              | 78.0, CH               |
| 38    | 1.57, m                                        | 46.8, CH <sub>2</sub>  | Glc-4 | 3.30, m              | 71.7, CH               |
| 39    | 4.06, m                                        | 66.4, CH               | Glc-5 | 3.20, m              | 78.1, CH               |
| 40    | a 1.57, m; b 1.61, m                           | 44.0, CH <sub>2</sub>  | Glc-6 | a 3.66, m; b 3.82, m | 62.7, CH <sub>2</sub>  |
| 41    | 4.03, m                                        | 73.7, CH               | maG-1 | 4.44, d(7.3)         | 104.3, CH              |
| 42    | 1.62, m                                        | 40.82, CH              | maG-2 | 3.47, dd(10.2, 7.3)  | 70.6, CH               |
| Me-42 | 0.94, d                                        | 6.68, CH <sub>3</sub>  | maG-3 | 2.98, t(10.2)        | 66.2, CH               |
| 43    | 3.80, m                                        | 77.5, CH               | maG-4 | 3.34, m              | 71.52, CH              |
| 44    | 1.66, m                                        | 41.8, CH               | maG-5 | 3.39, dd(8.8, 6.3)   | 74.2, CH               |
| Me-44 | 0.83, d                                        | 10.8, CH <sub>2</sub>  | maG-6 | 1.32, d(6.3)         | 18.2, CH <sub>3</sub>  |
|       |                                                |                        | N-Me  | 2.78, s              | 31.4, CH <sub>3</sub>  |

**Table S2.** MIC ( $\mu\text{g/mL}$ , n = 5 strains) ranges of gargantulide A (1) and comparator antibiotics against multi-drug resistant Gram-positive pathogens.<sup>a</sup>

| <b>Compound</b> | <b>MRSA</b> | <b>MRSE</b> | <b>VRE</b>         | <b>PRSP</b>        |
|-----------------|-------------|-------------|--------------------|--------------------|
| Gargantulide A  | 1-2         | 1-1         | 0.25-1             | 0.125-0.5          |
| Oxacillin       | 32->128     | 16->128     | 16->128            | 8-64               |
| Penicillin G    | 64-128      | 16-16       | 2->128             | 1-16               |
| Vancomycin      | 2-4         | 2-2         | 128->128           | 0.25-1             |
| Linezolid       | 1-4         | 1-2         | 2-4                | 0.5-1              |
| Trimethoprim    | 0.5-64      | >128        | $\leq 0.125$ ->128 | 32-128             |
| Erythromycin    | 2->128      | 0.5->128    | 4->128             | $\leq 0.125$ ->128 |

<sup>a</sup> MRSA methicillin-resistant *S. aureus*, MRSE methicillin-resistant *S. epidermidis*, VRE vancomycin-resistant enterococci, PRSP penicillin-resistant *S. pneumoniae*.

RT: 34.00 - 38.00 SM: 13B

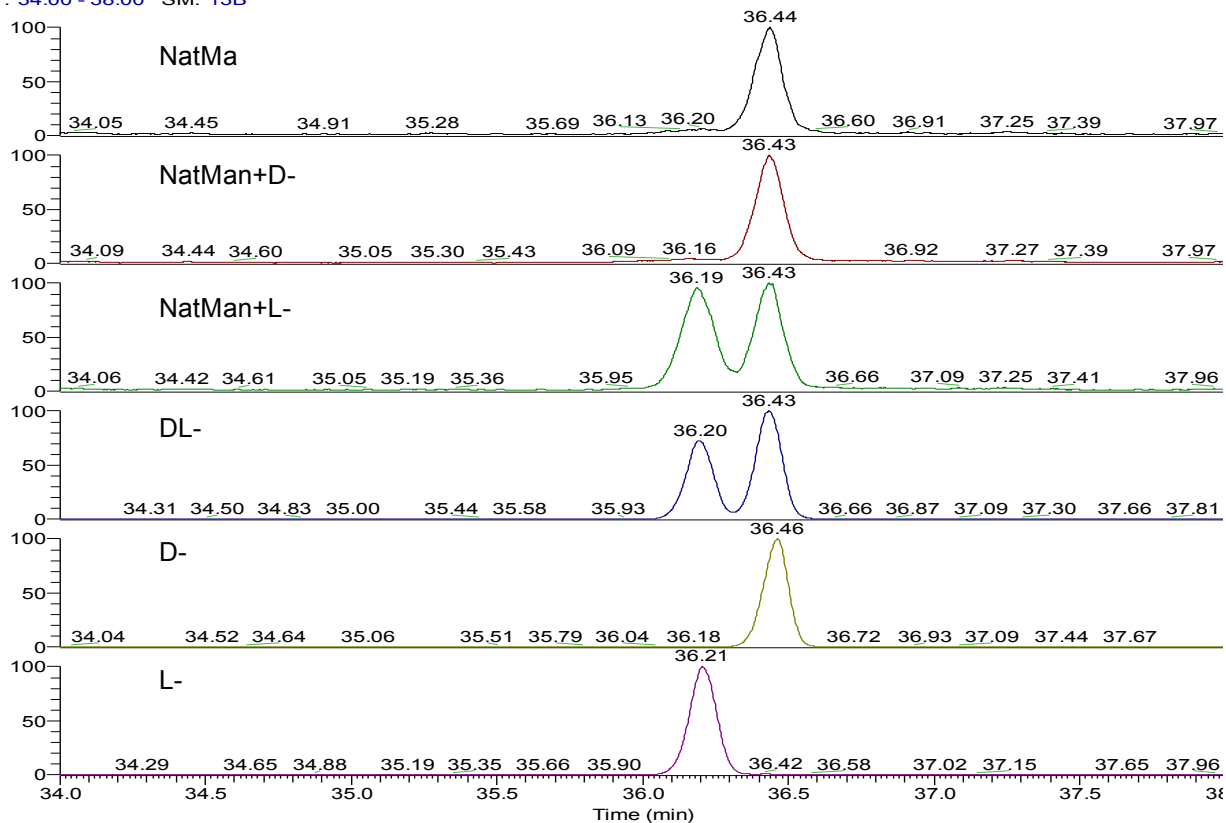

RT: 0.00 - 61.04 SM: 15B

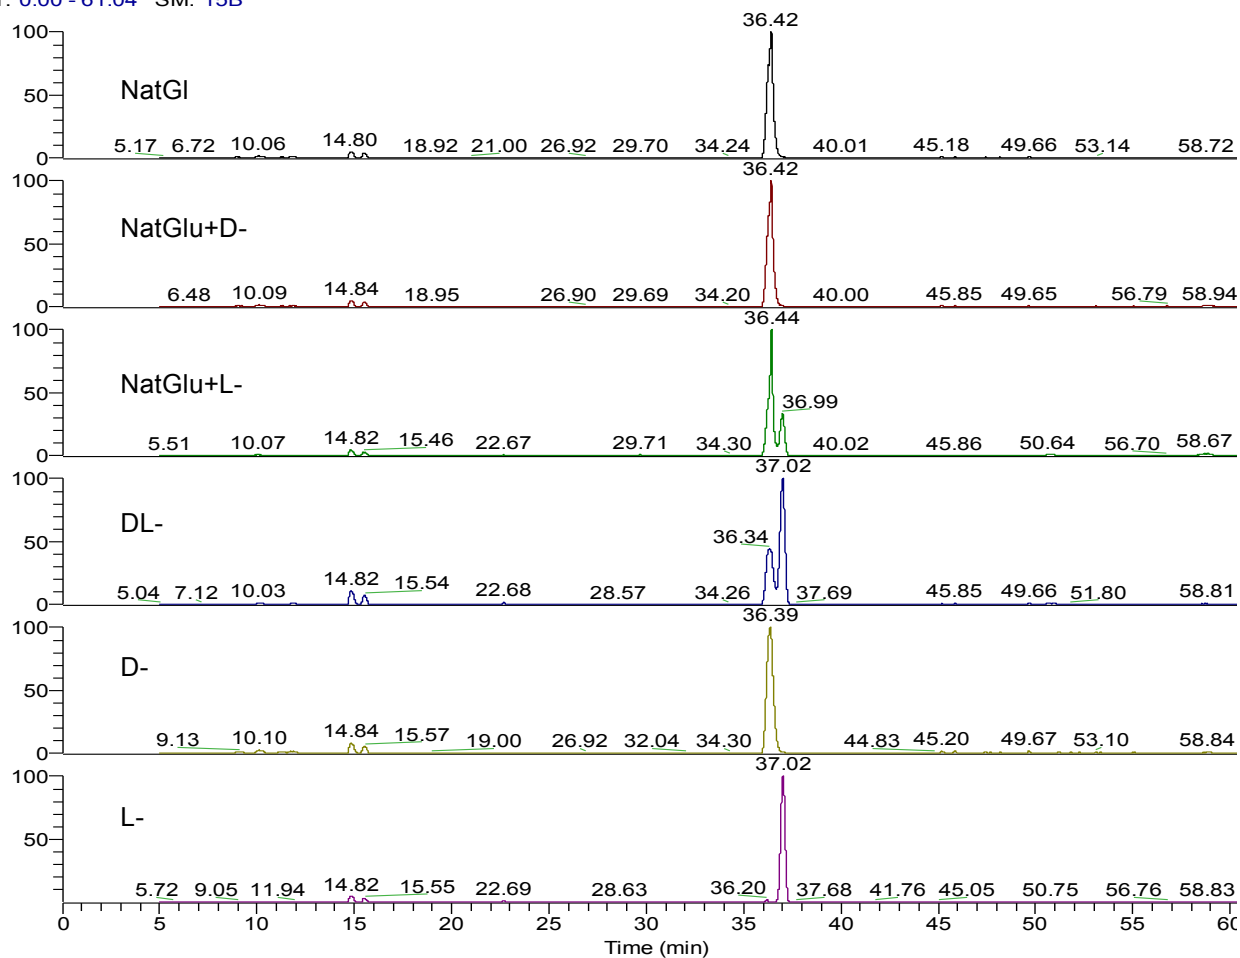

Figure S1. GC/MS analysis after additional acid hydrolysis and trimethylsilylation.

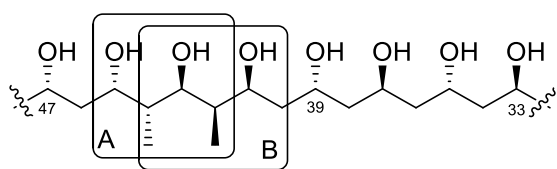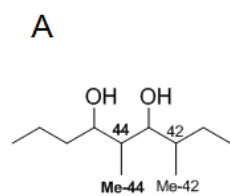

|           | 45       | 44       | 43       | 42       |  | 45        | 44      | 43       | 42       |
|-----------|----------|----------|----------|----------|--|-----------|---------|----------|----------|
| <b>1a</b> | $\alpha$ | $\alpha$ | $\beta$  | $\beta$  |  | <b>1e</b> | $\beta$ | $\alpha$ | $\beta$  |
| <b>1b</b> | $\alpha$ | $\alpha$ | $\alpha$ | $\alpha$ |  | <b>1f</b> | $\beta$ | $\alpha$ | $\alpha$ |
| <b>1c</b> | $\alpha$ | $\alpha$ | $\beta$  | $\alpha$ |  | <b>1g</b> | $\beta$ | $\alpha$ | $\beta$  |
| <b>1d</b> | $\alpha$ | $\alpha$ | $\alpha$ | $\beta$  |  | <b>1h</b> | $\beta$ | $\alpha$ | $\alpha$ |

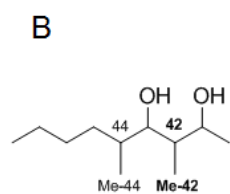

|           | 44       | 43       | 42      | 41      |  | 44        | 43       | 42       | 41       |
|-----------|----------|----------|---------|---------|--|-----------|----------|----------|----------|
| <b>2a</b> | $\alpha$ | $\alpha$ | $\beta$ | $\beta$ |  | <b>2e</b> | $\alpha$ | $\alpha$ | $\beta$  |
| <b>2b</b> | $\beta$  | $\beta$  | $\beta$ | $\beta$ |  | <b>2f</b> | $\beta$  | $\beta$  | $\alpha$ |
| <b>2c</b> | $\beta$  | $\alpha$ | $\beta$ | $\beta$ |  | <b>2g</b> | $\beta$  | $\alpha$ | $\beta$  |
| <b>2d</b> | $\alpha$ | $\beta$  | $\beta$ | $\beta$ |  | <b>2h</b> | $\alpha$ | $\beta$  | $\beta$  |

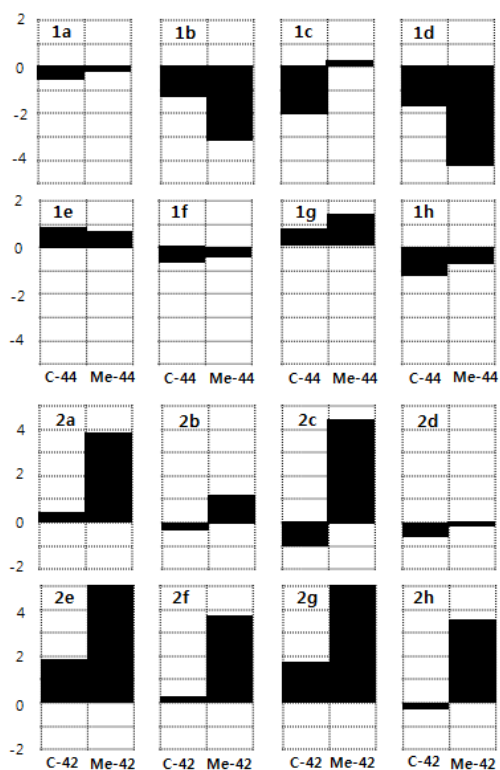

Figure S2. Application of Kishi's NMR database for the consecutive hydroxyl/methyl/hydroxyl/methyl substituents from C-42 to C-45.



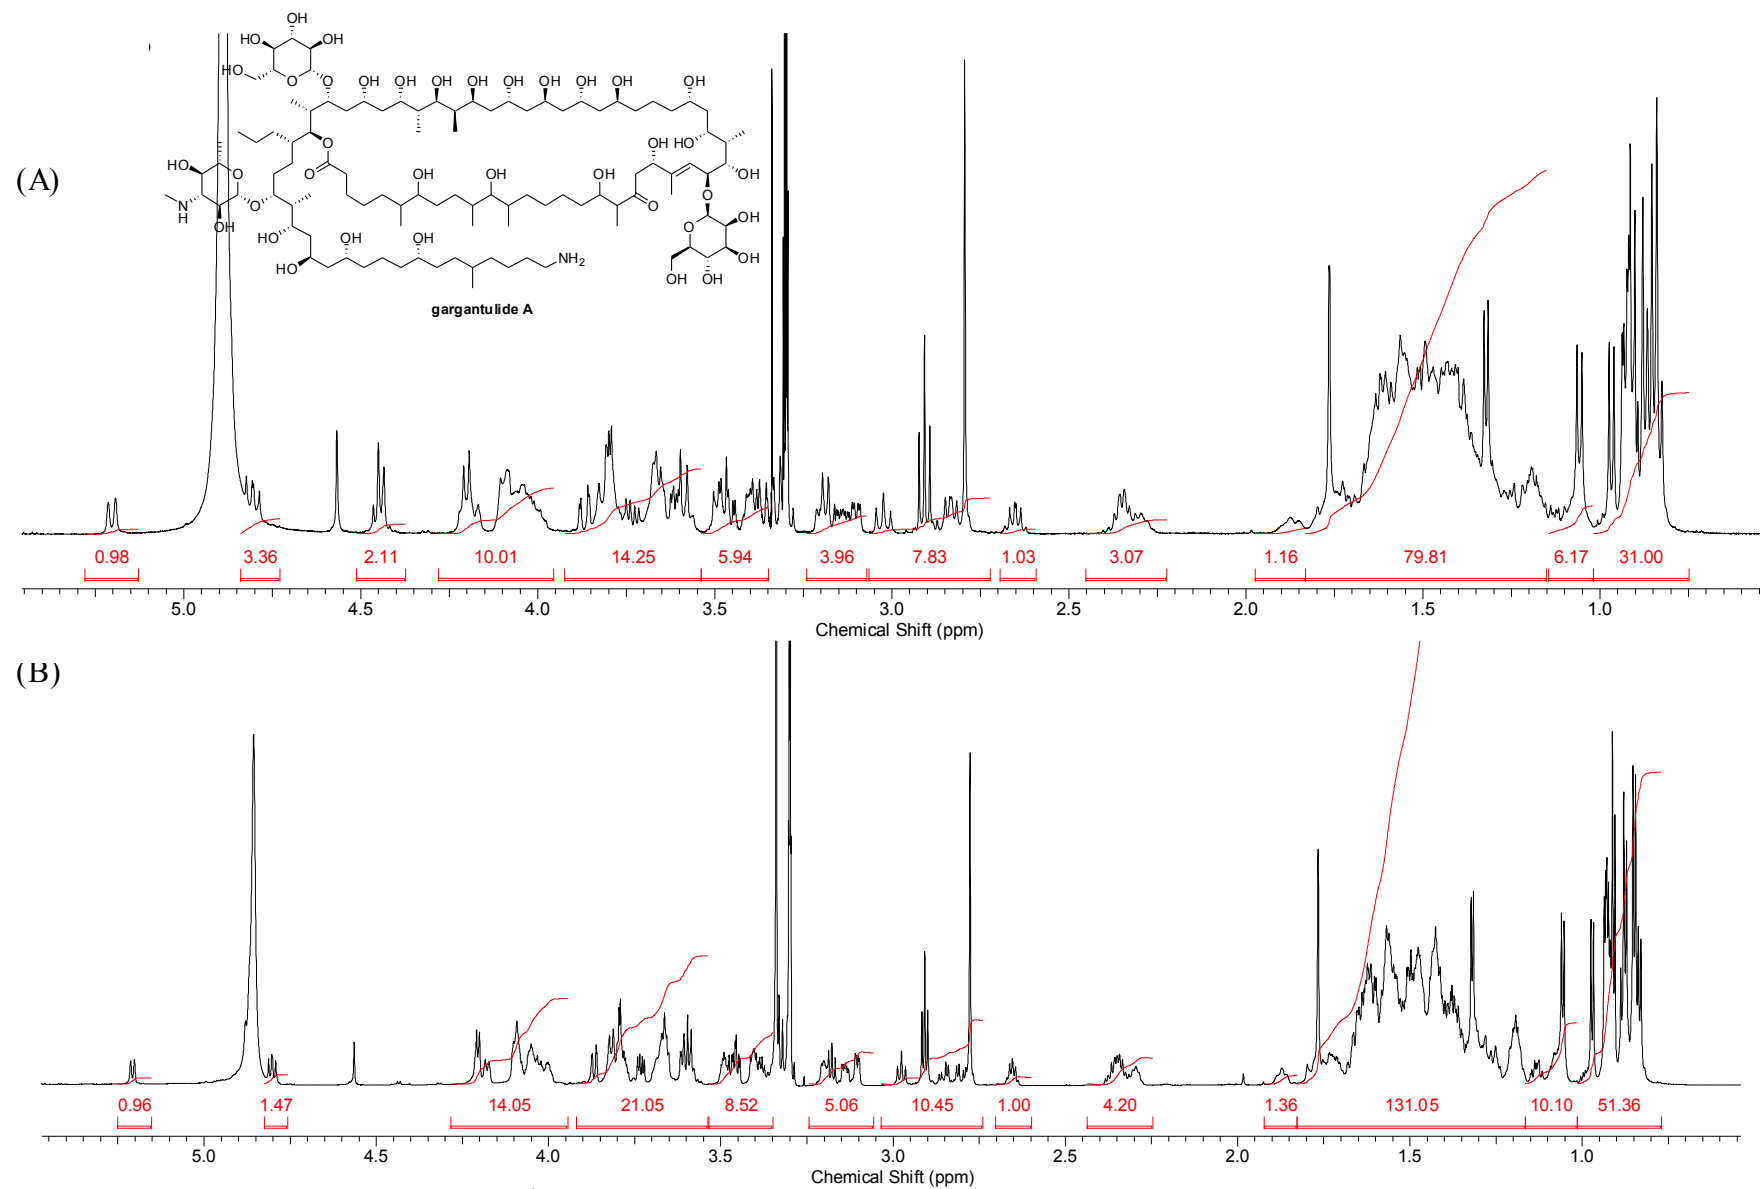

Figure S3.  $^1\text{H}$  NMR spectra of gargantulide A (**1**) at 500MHz (A) and 900MHz (B).

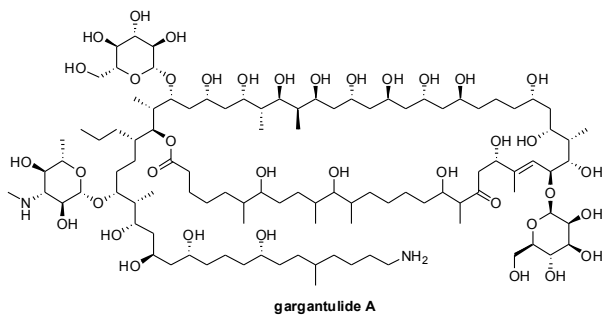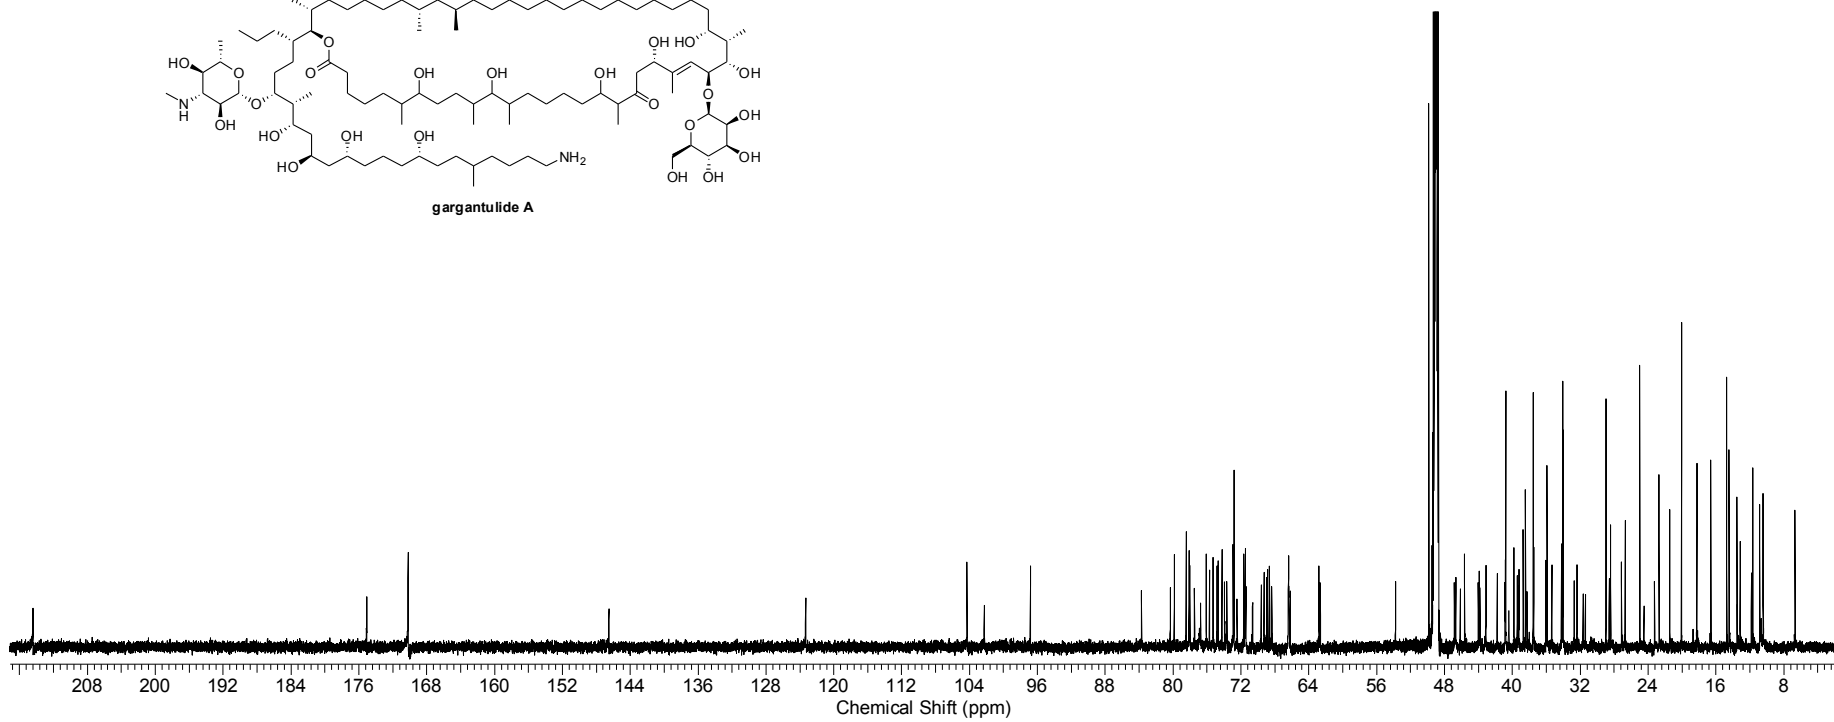

Figure S4. <sup>13</sup>C NMR spectrum of gargantulide A (1) at 900MHz.

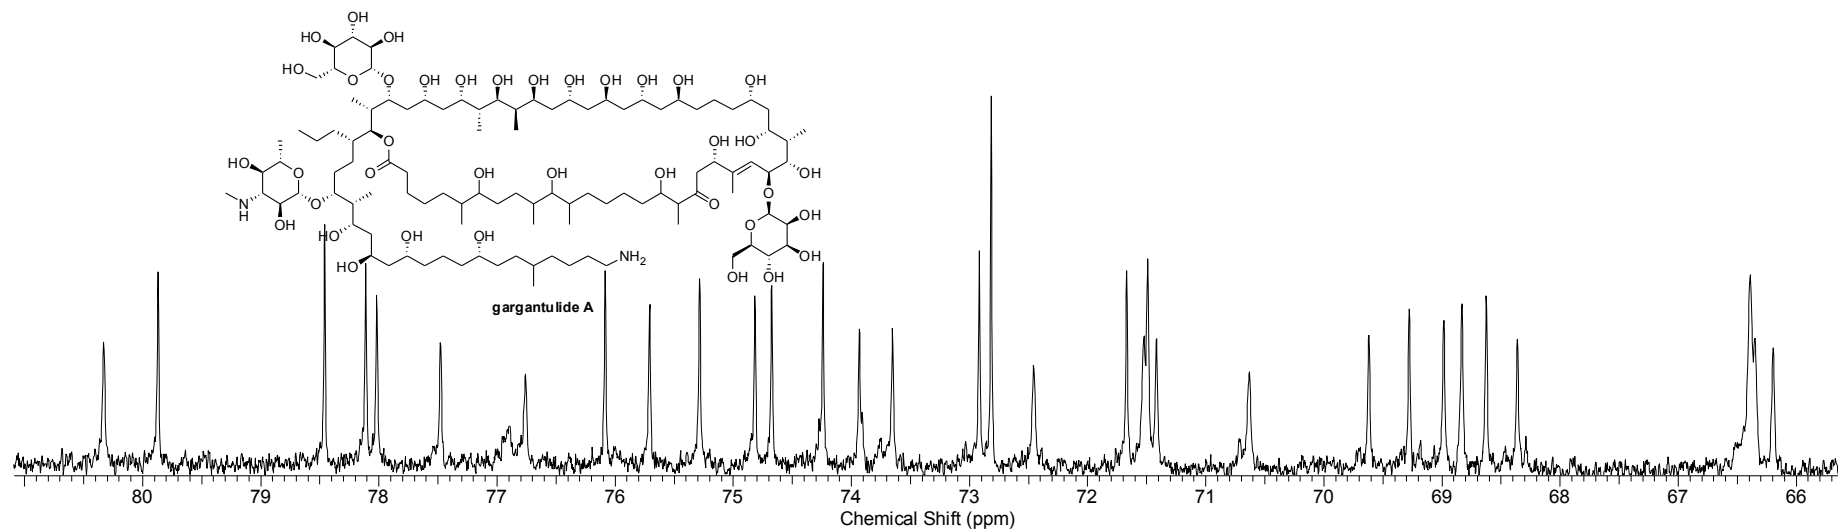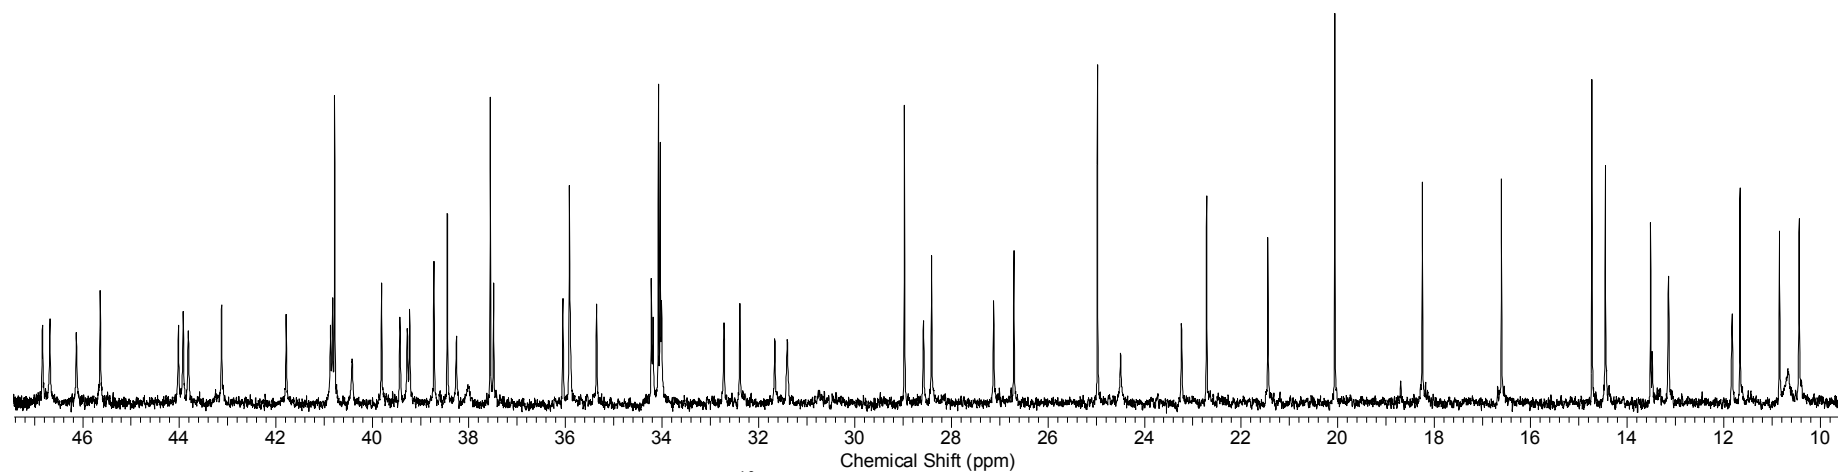

Figure S5. Expanded  $^{13}\text{C}$  NMR spectrum of gargantulide A (1) at 900MHz.

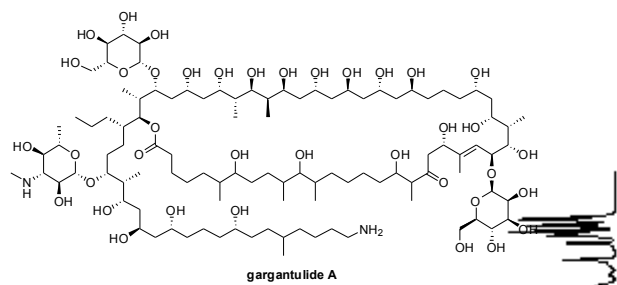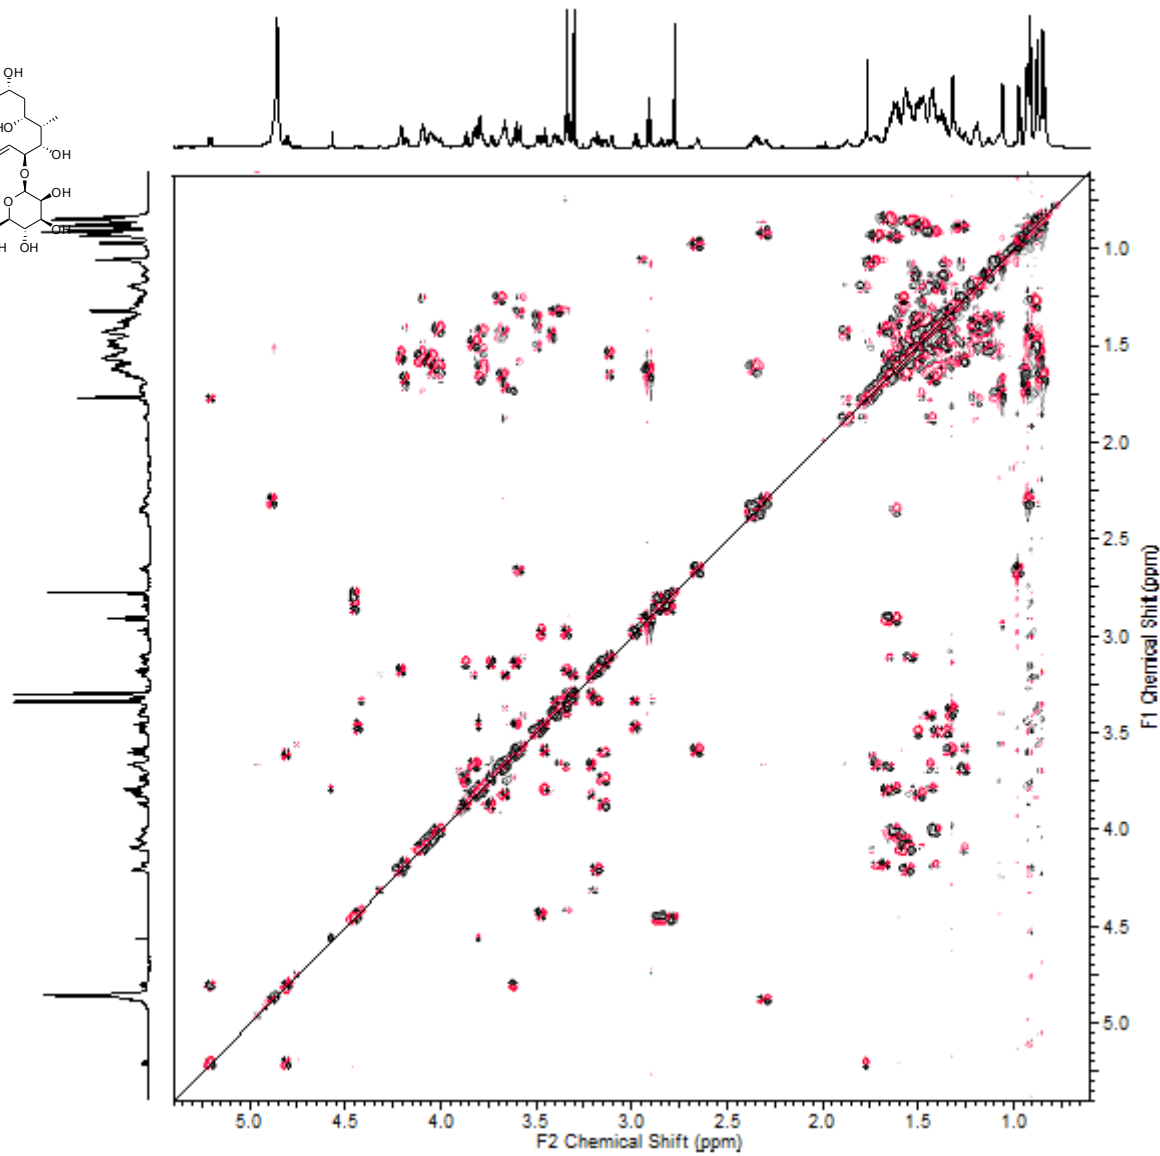

Figure S6. DQF-COSY NMR spectrum of gargantulide A (**1**) at 900MHz

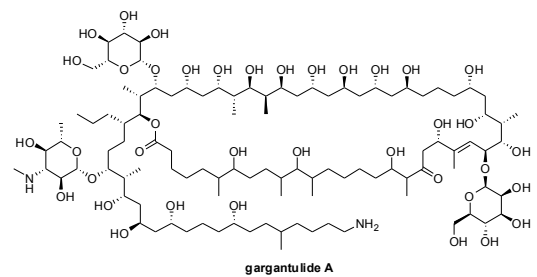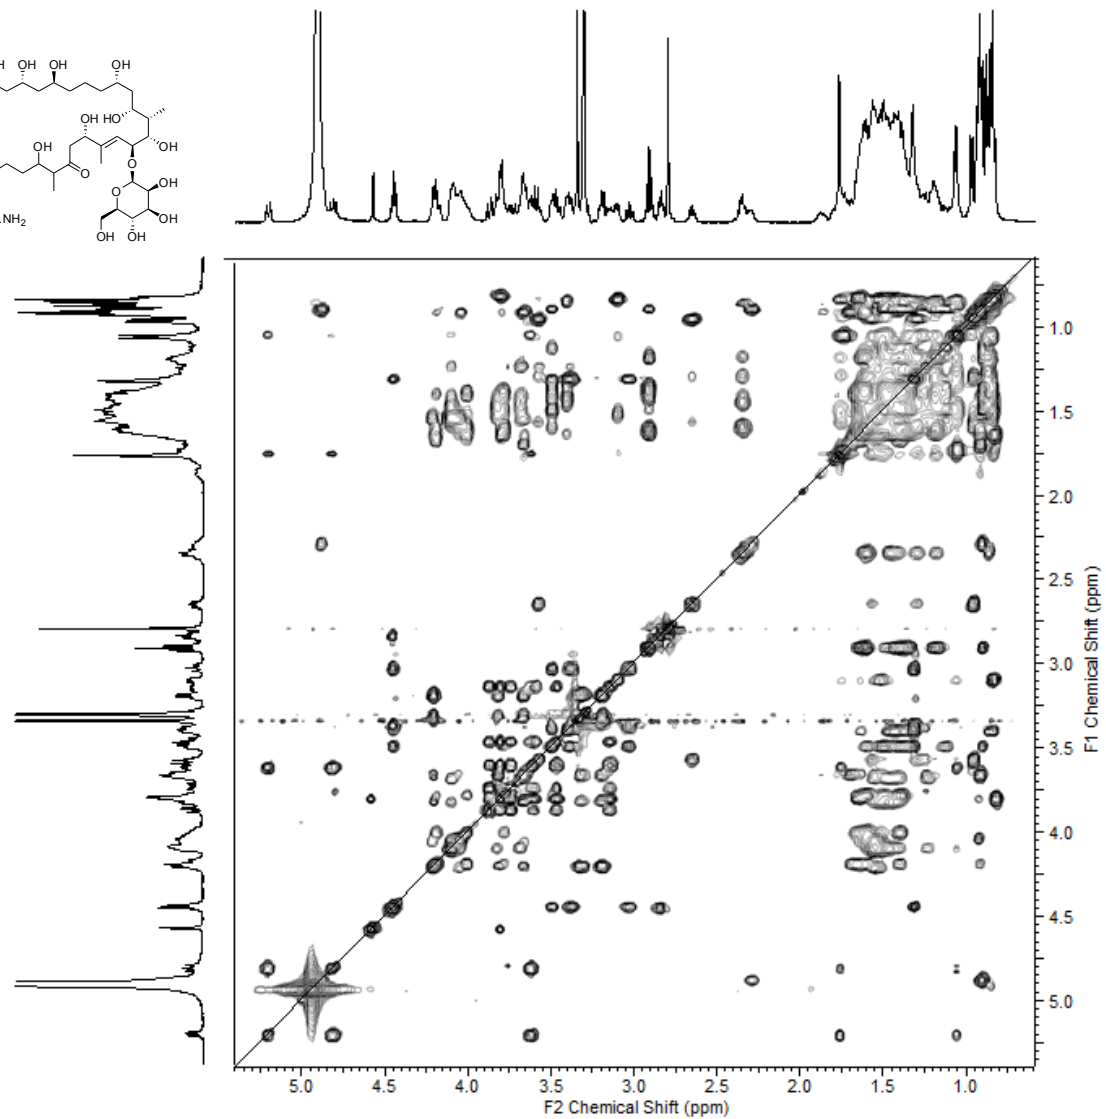

Figure S7. TOCSY spectrum of gargantulide A (**1**) at 500MHz

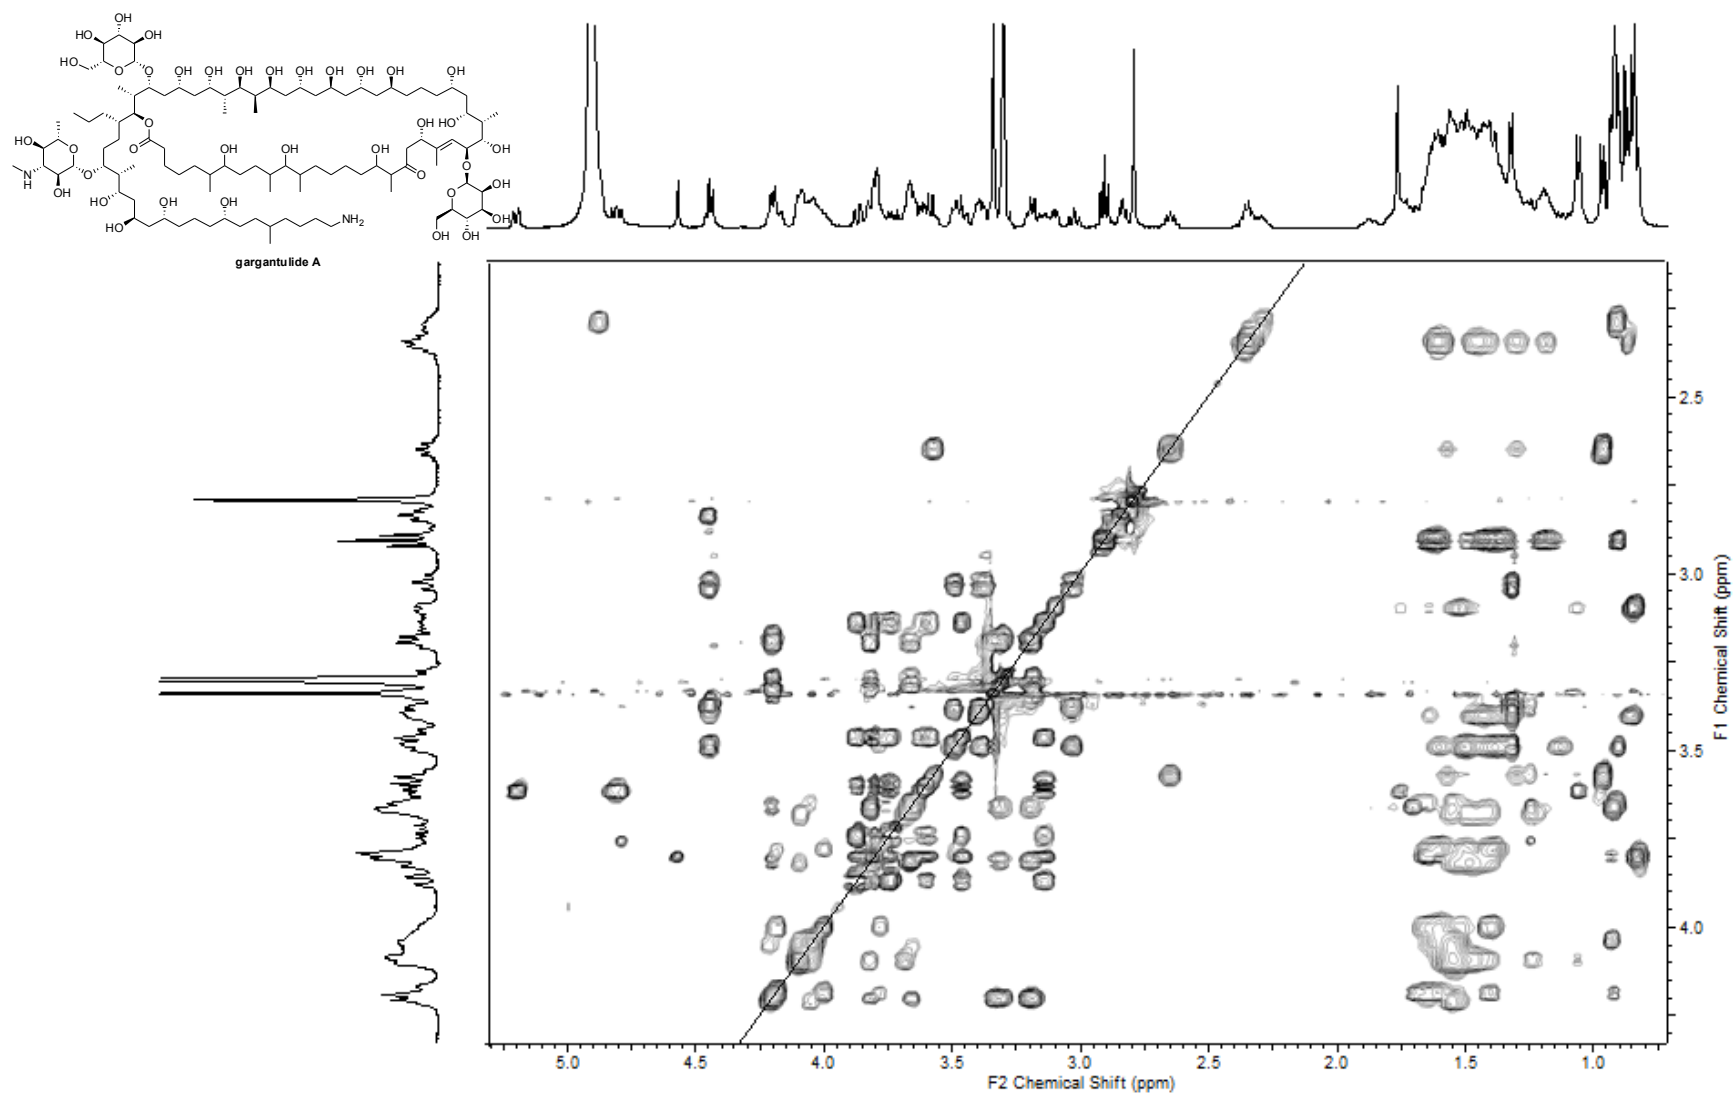

Figure S8. Expanded TOCSY spectrum of gargantulide A (1) at 500MHz.

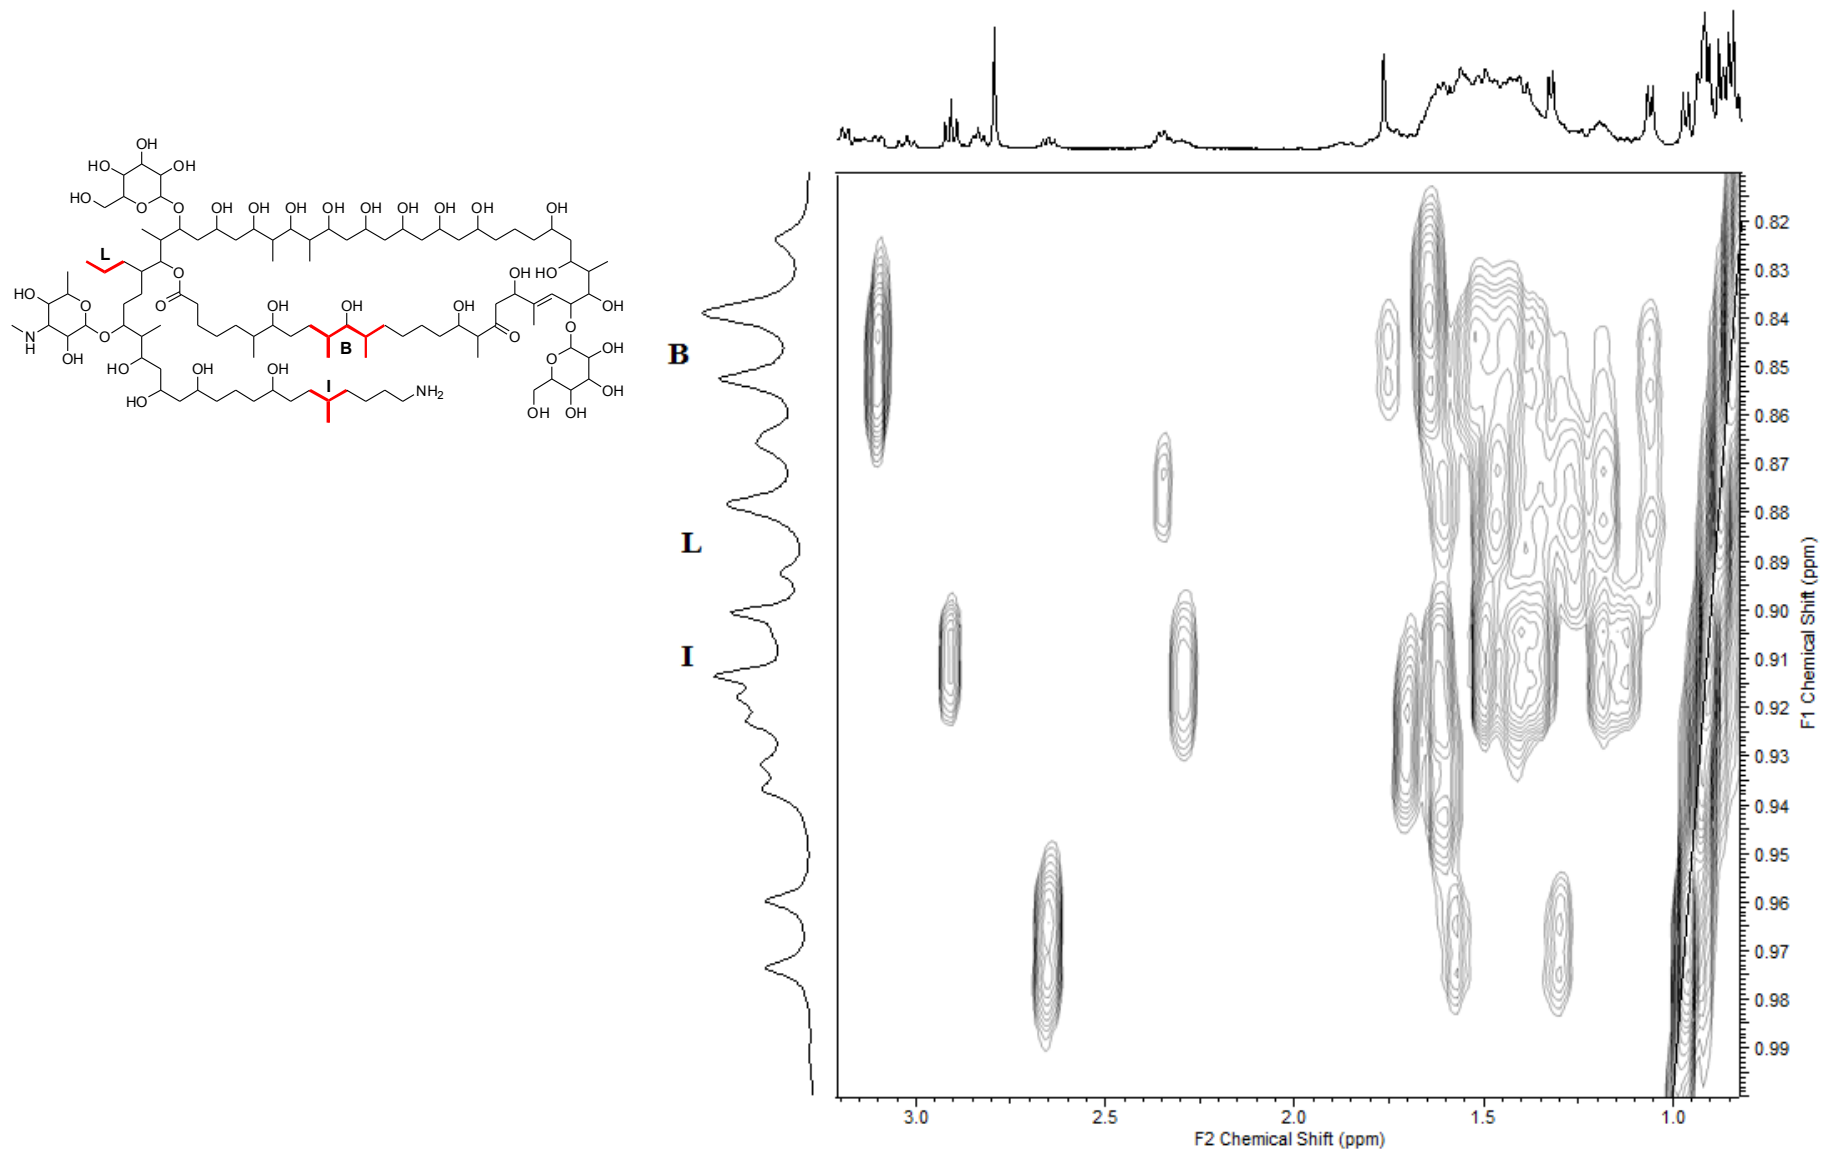

Figure S9. Expanded TOCSY spectrum of gargantulide A (**1**) at 500MHz.

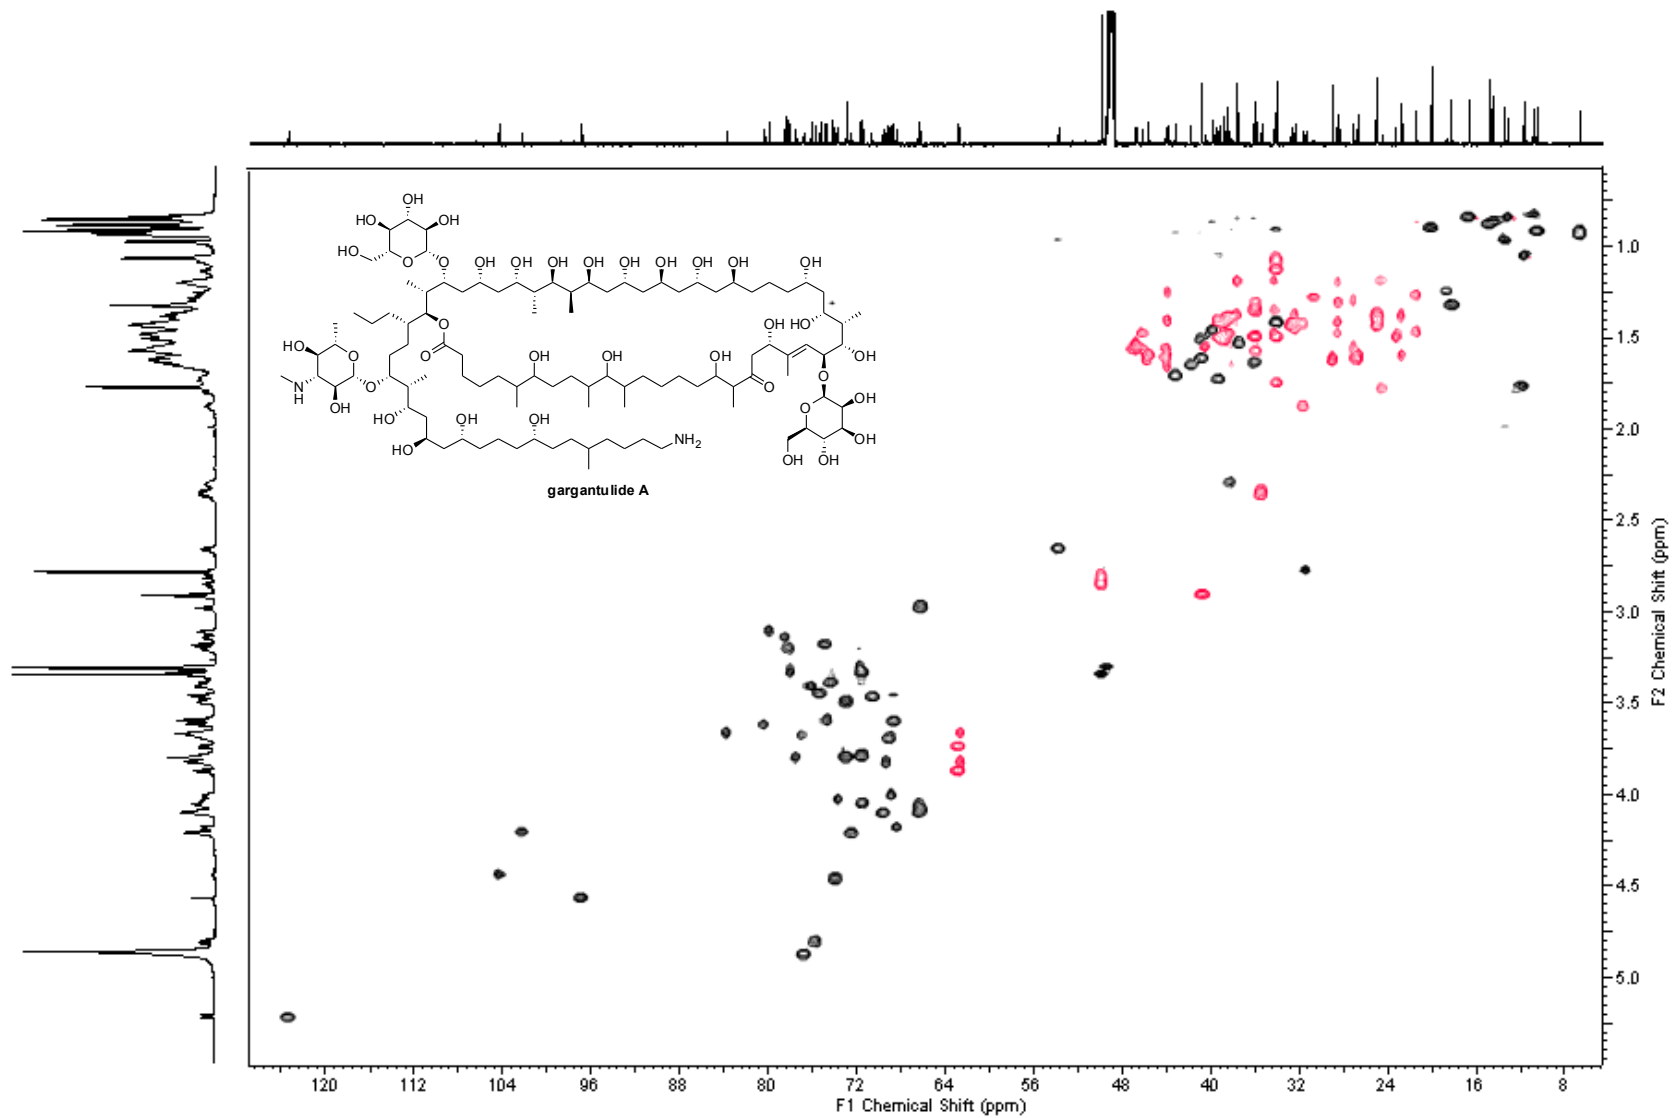

Figure S10. HSQC spectrum of gargantulide A (1) [Red : CH<sub>2</sub>, Black: CH + CH<sub>3</sub>] at 900 MHz.



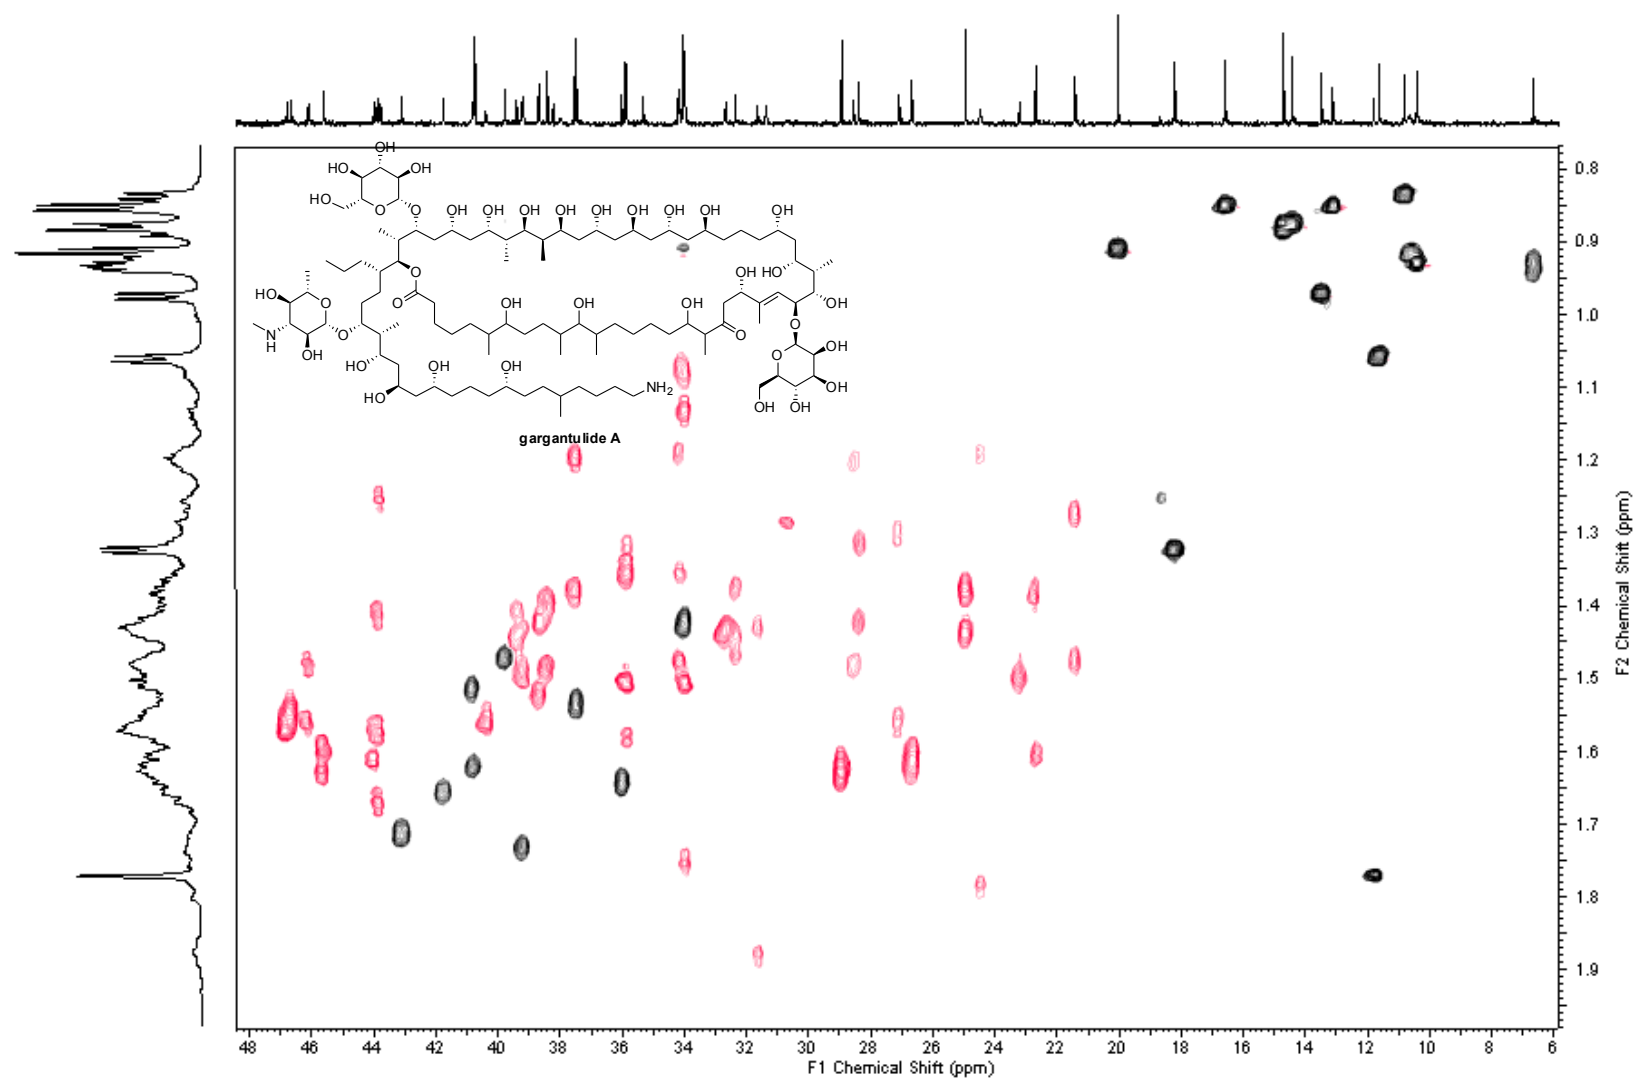

Figure S11. Expanded HSQC spectrum of gargantulide A (1) [Red :  $\text{CH}_2$ , Black:  $\text{CH} + \text{CH}_3$ ] at 900 MHz..

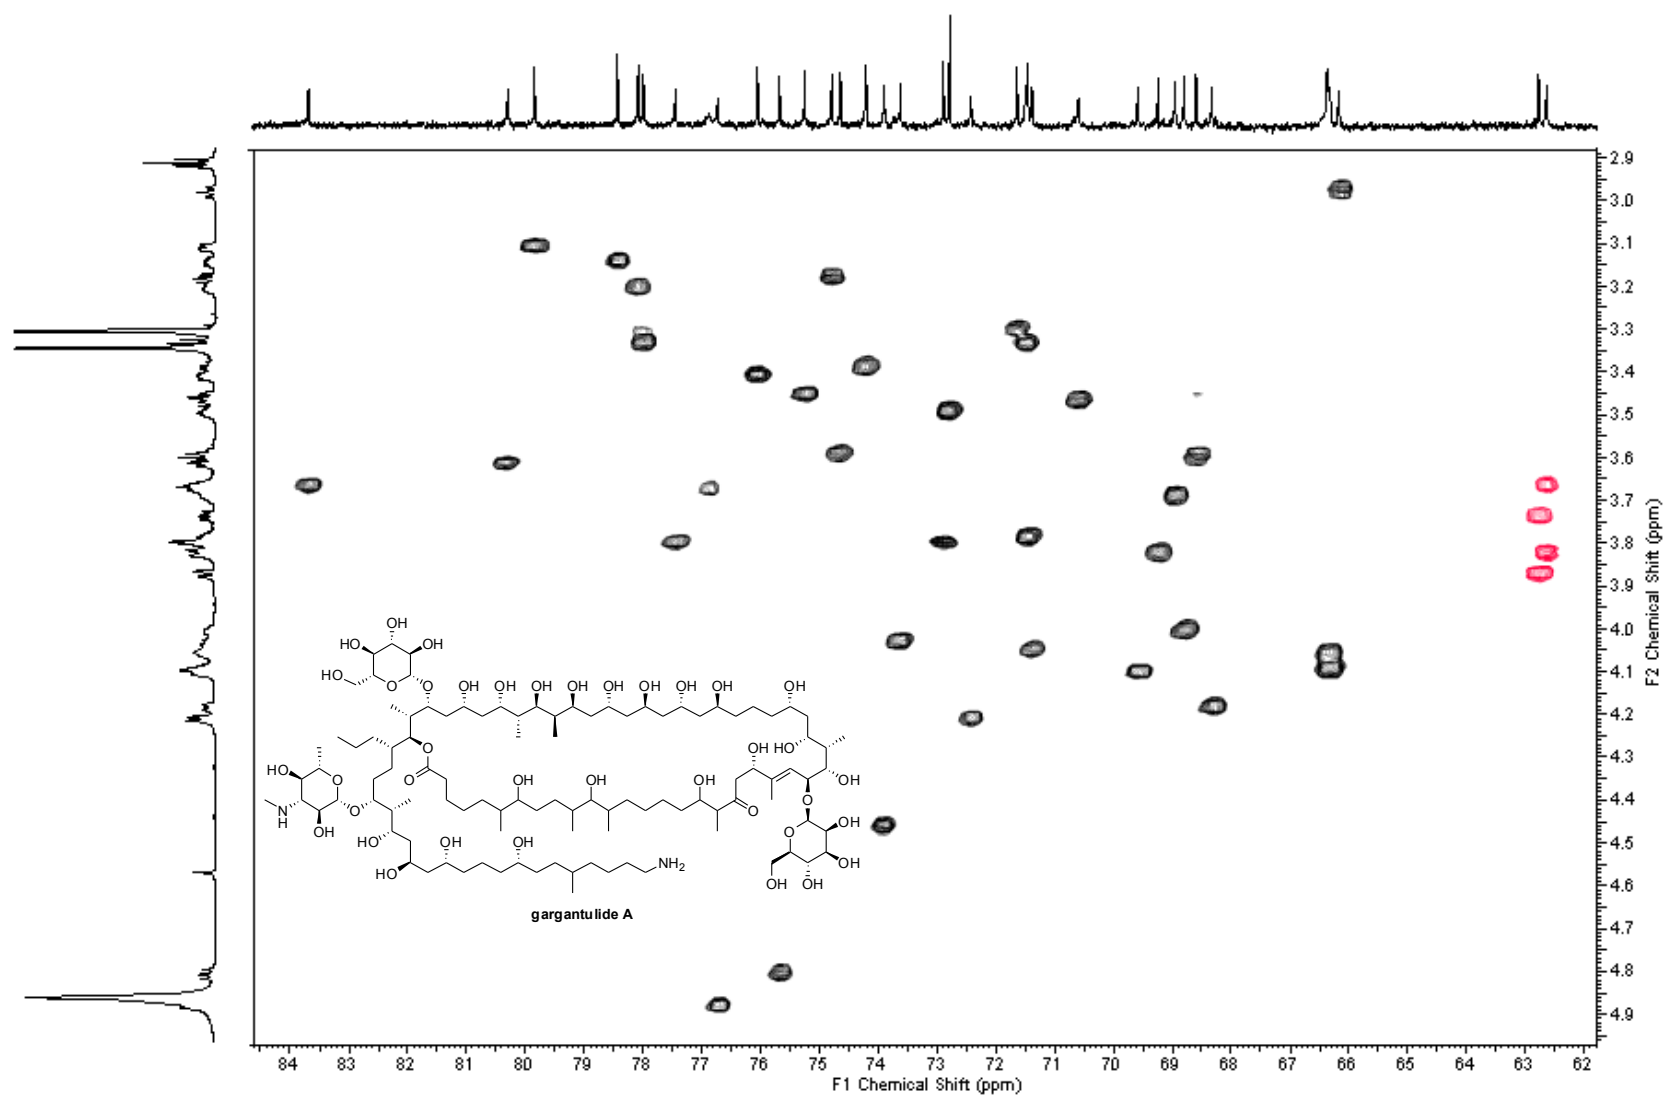

Figure S12. Expanded HSQC spectrum of gargantulide A (1) [Black : CH, Red: CH<sub>2</sub>] at 900 MHz..

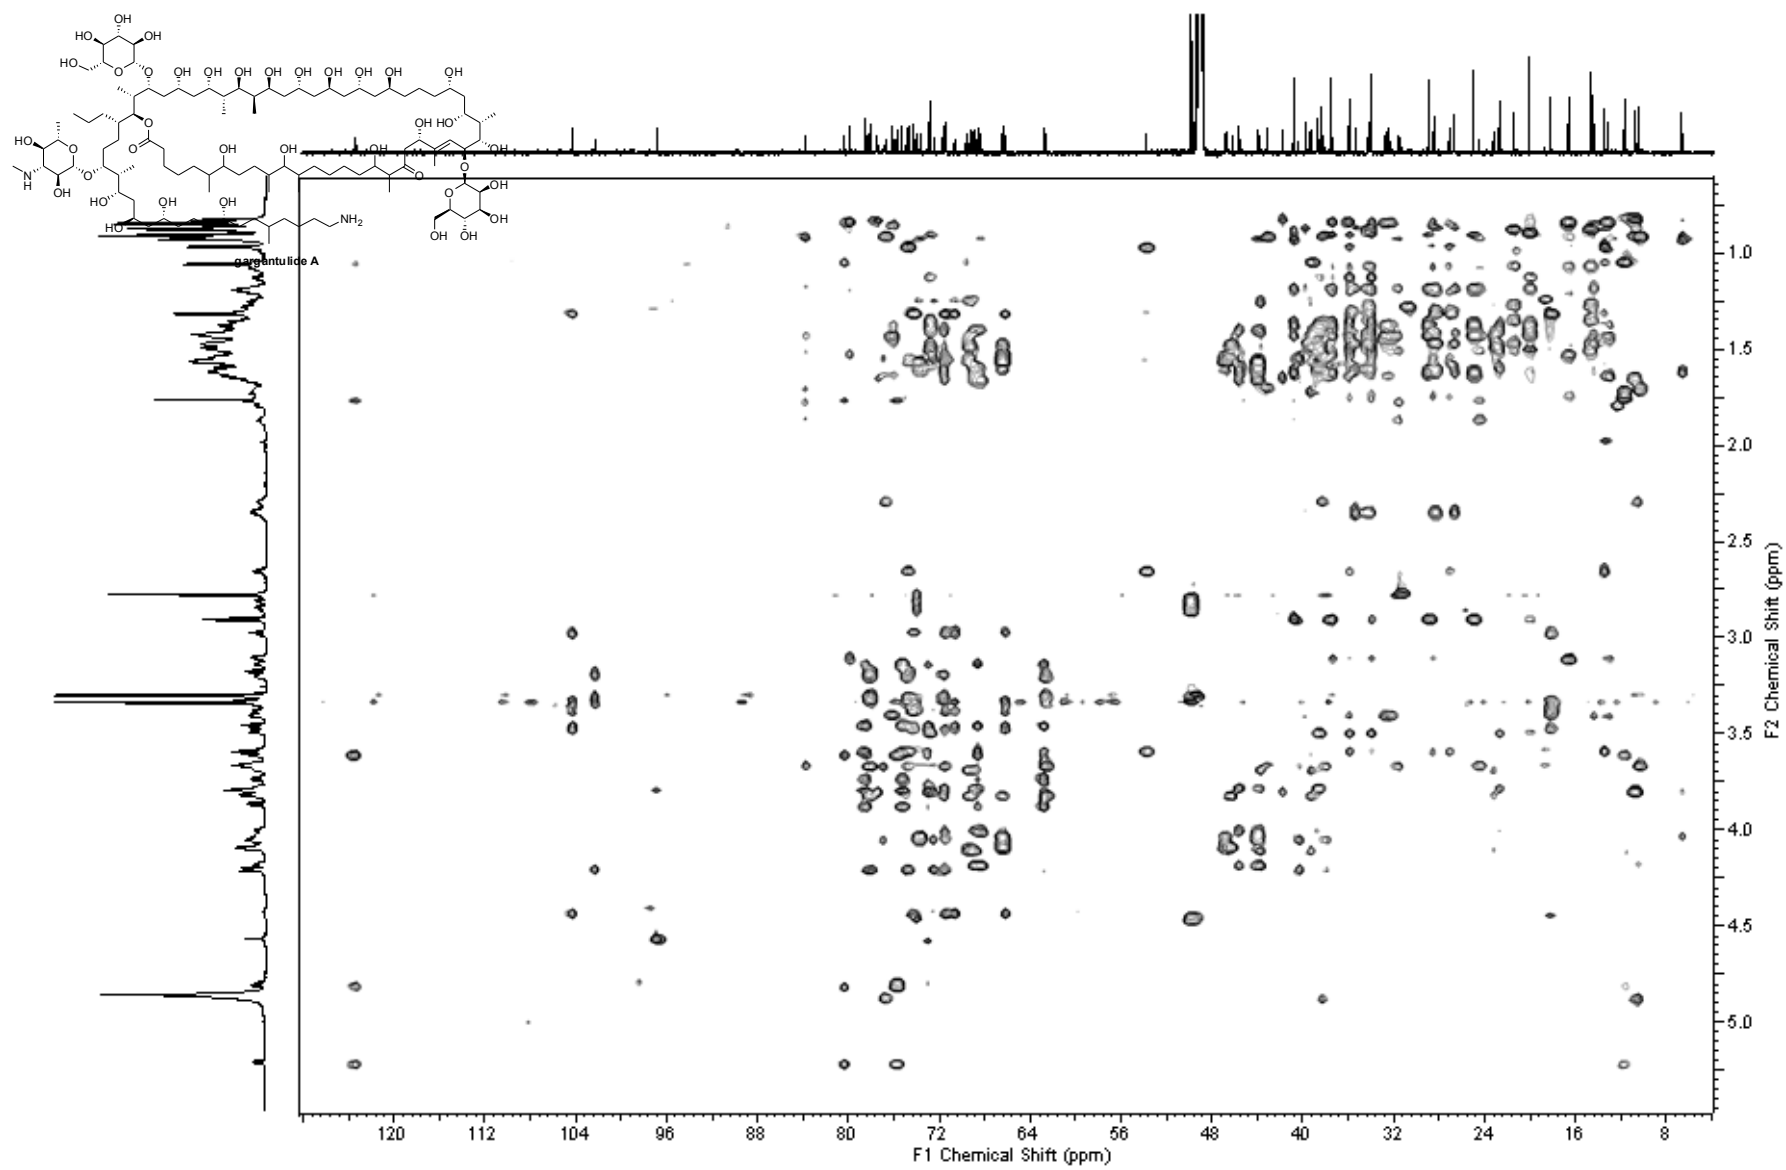

Figure S13. HSQC-TOCSY spectrum of gargantulide A (1) at 900 MHz.

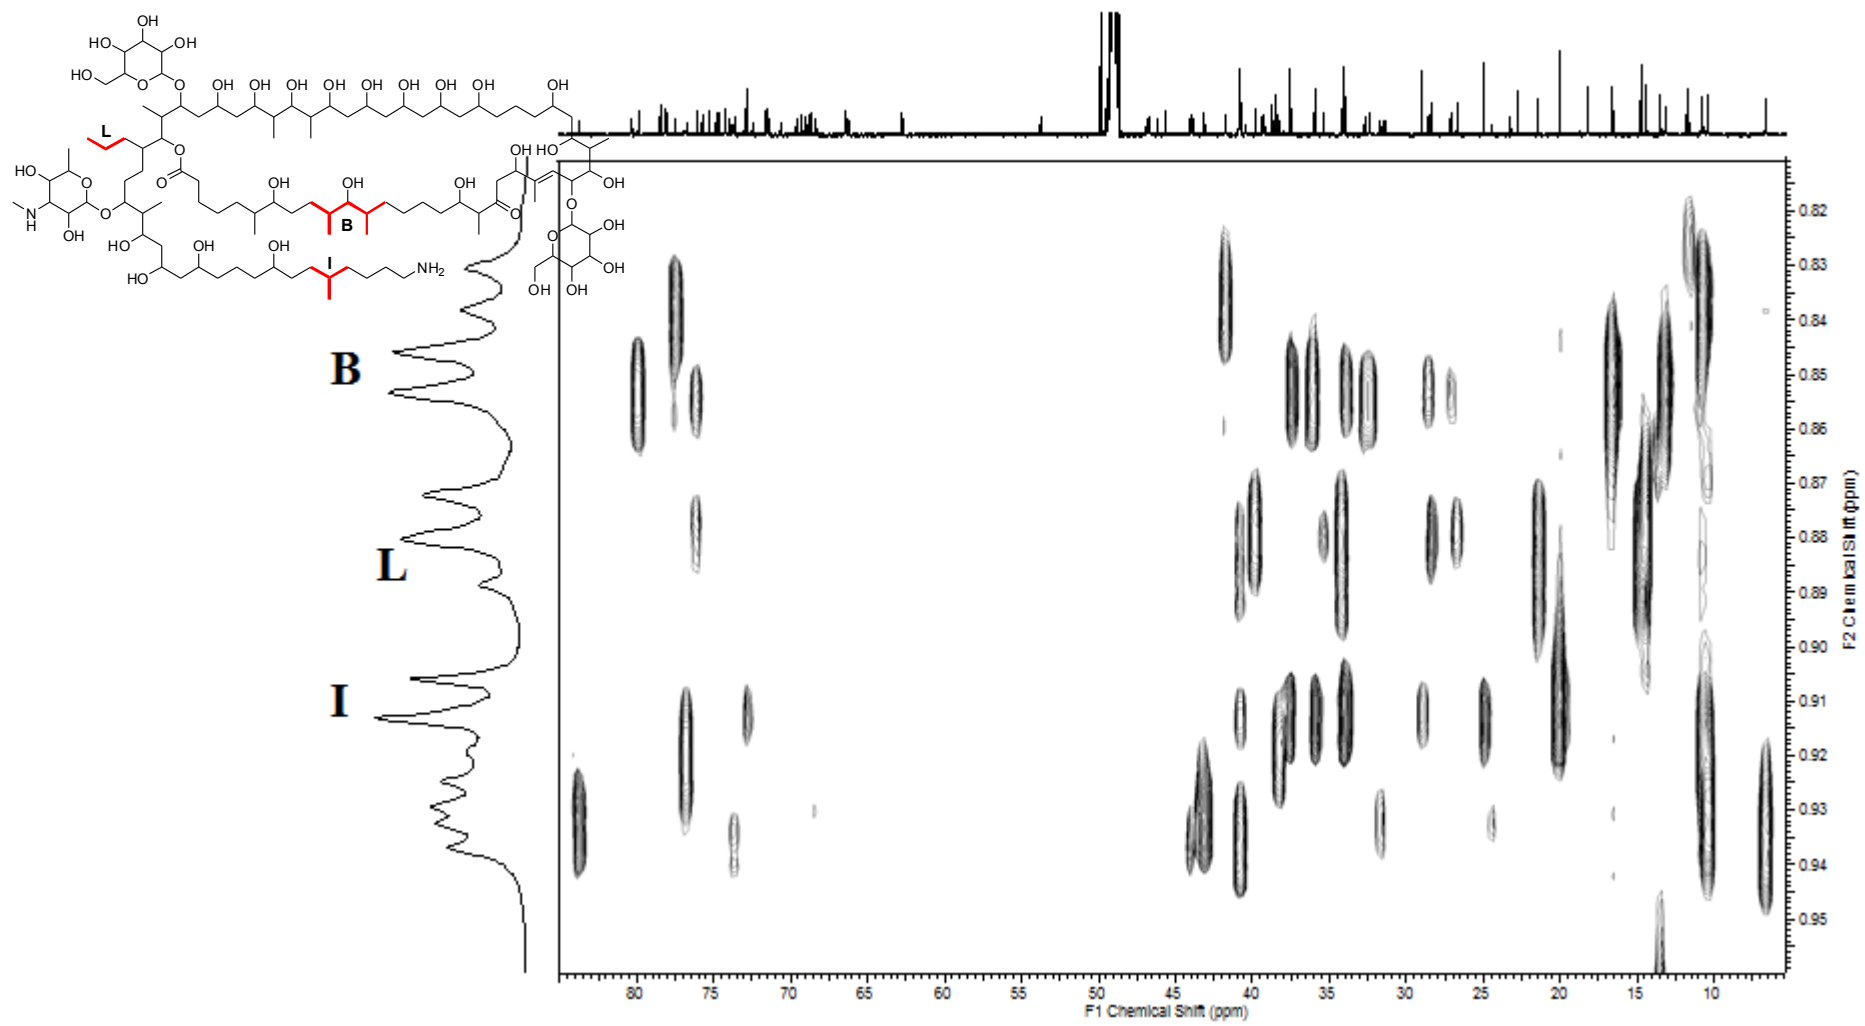

Figure S14. Expanded HSQC-TOCSY spectrum of gargantulide A (**1**) at 900 MHz.

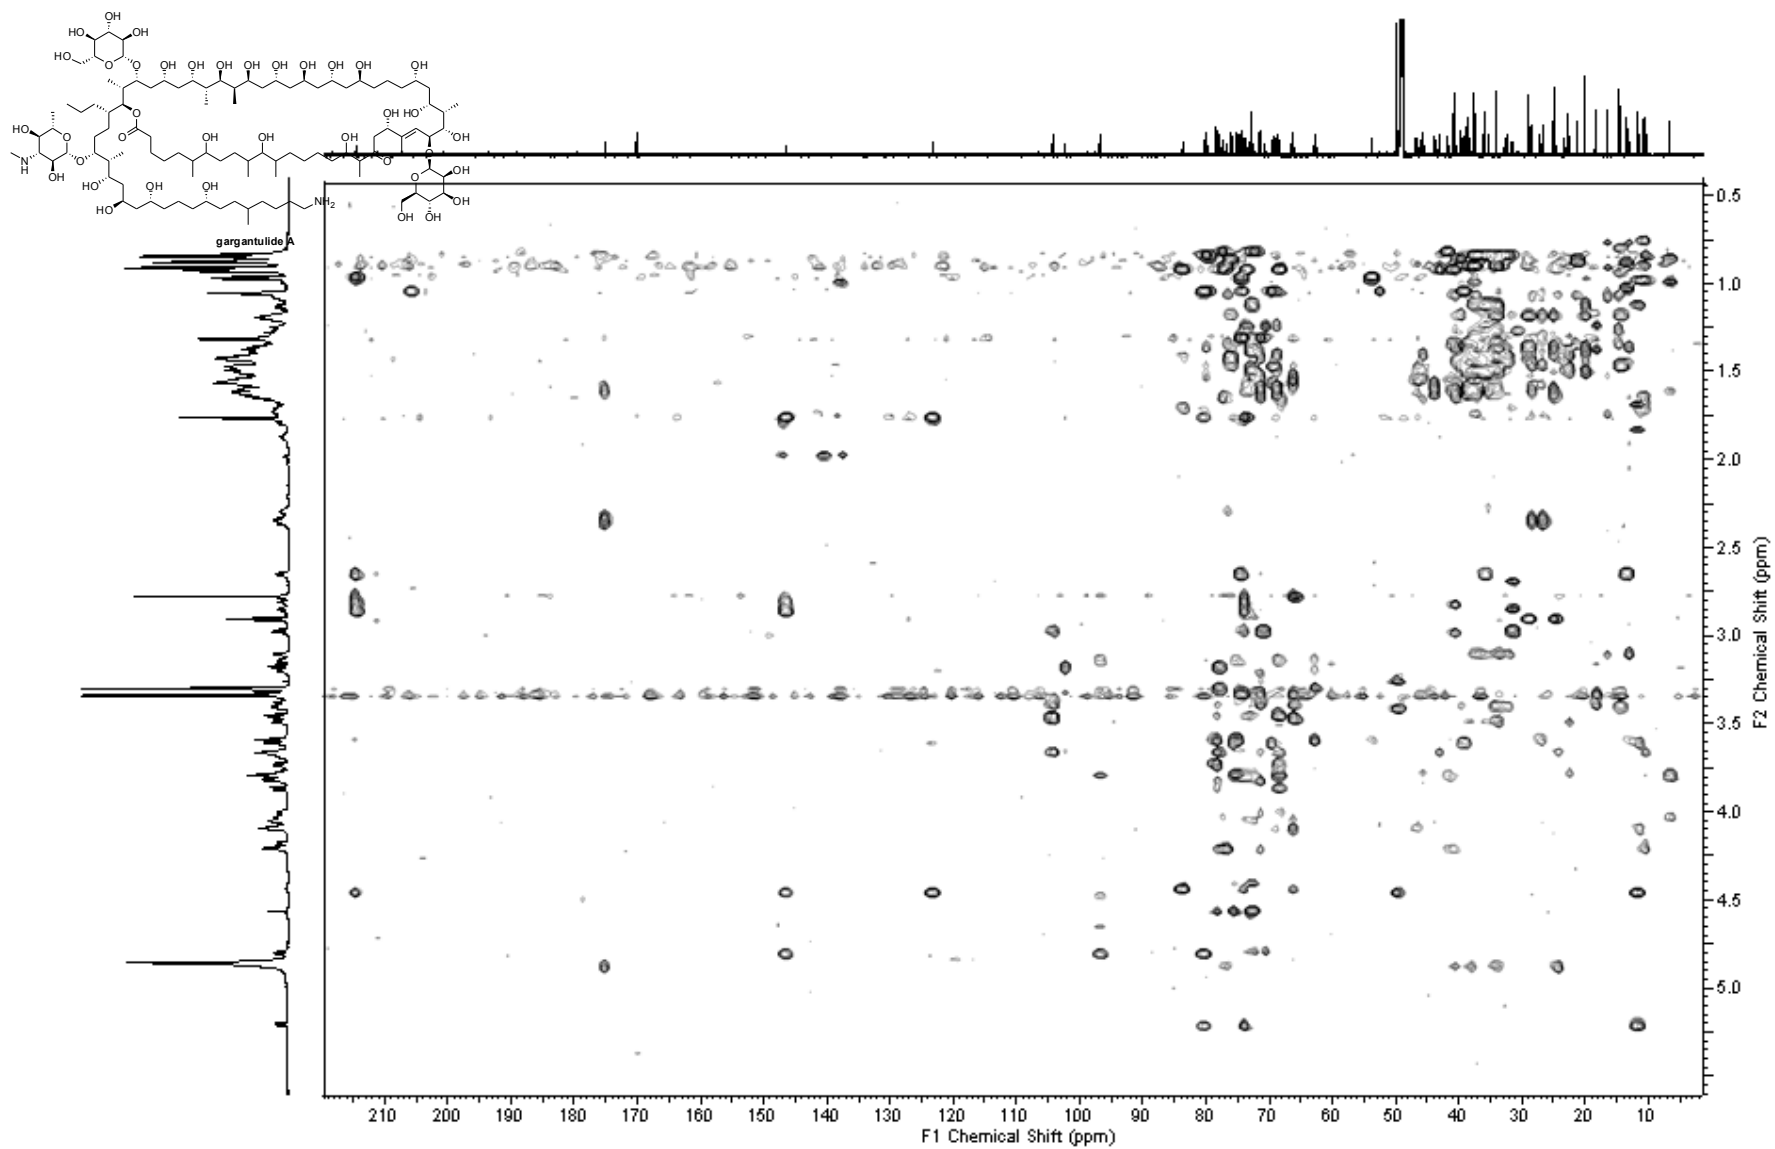

Figure S15. HMBC spectrum of gargantulide A (**1**) at 900 MHz.

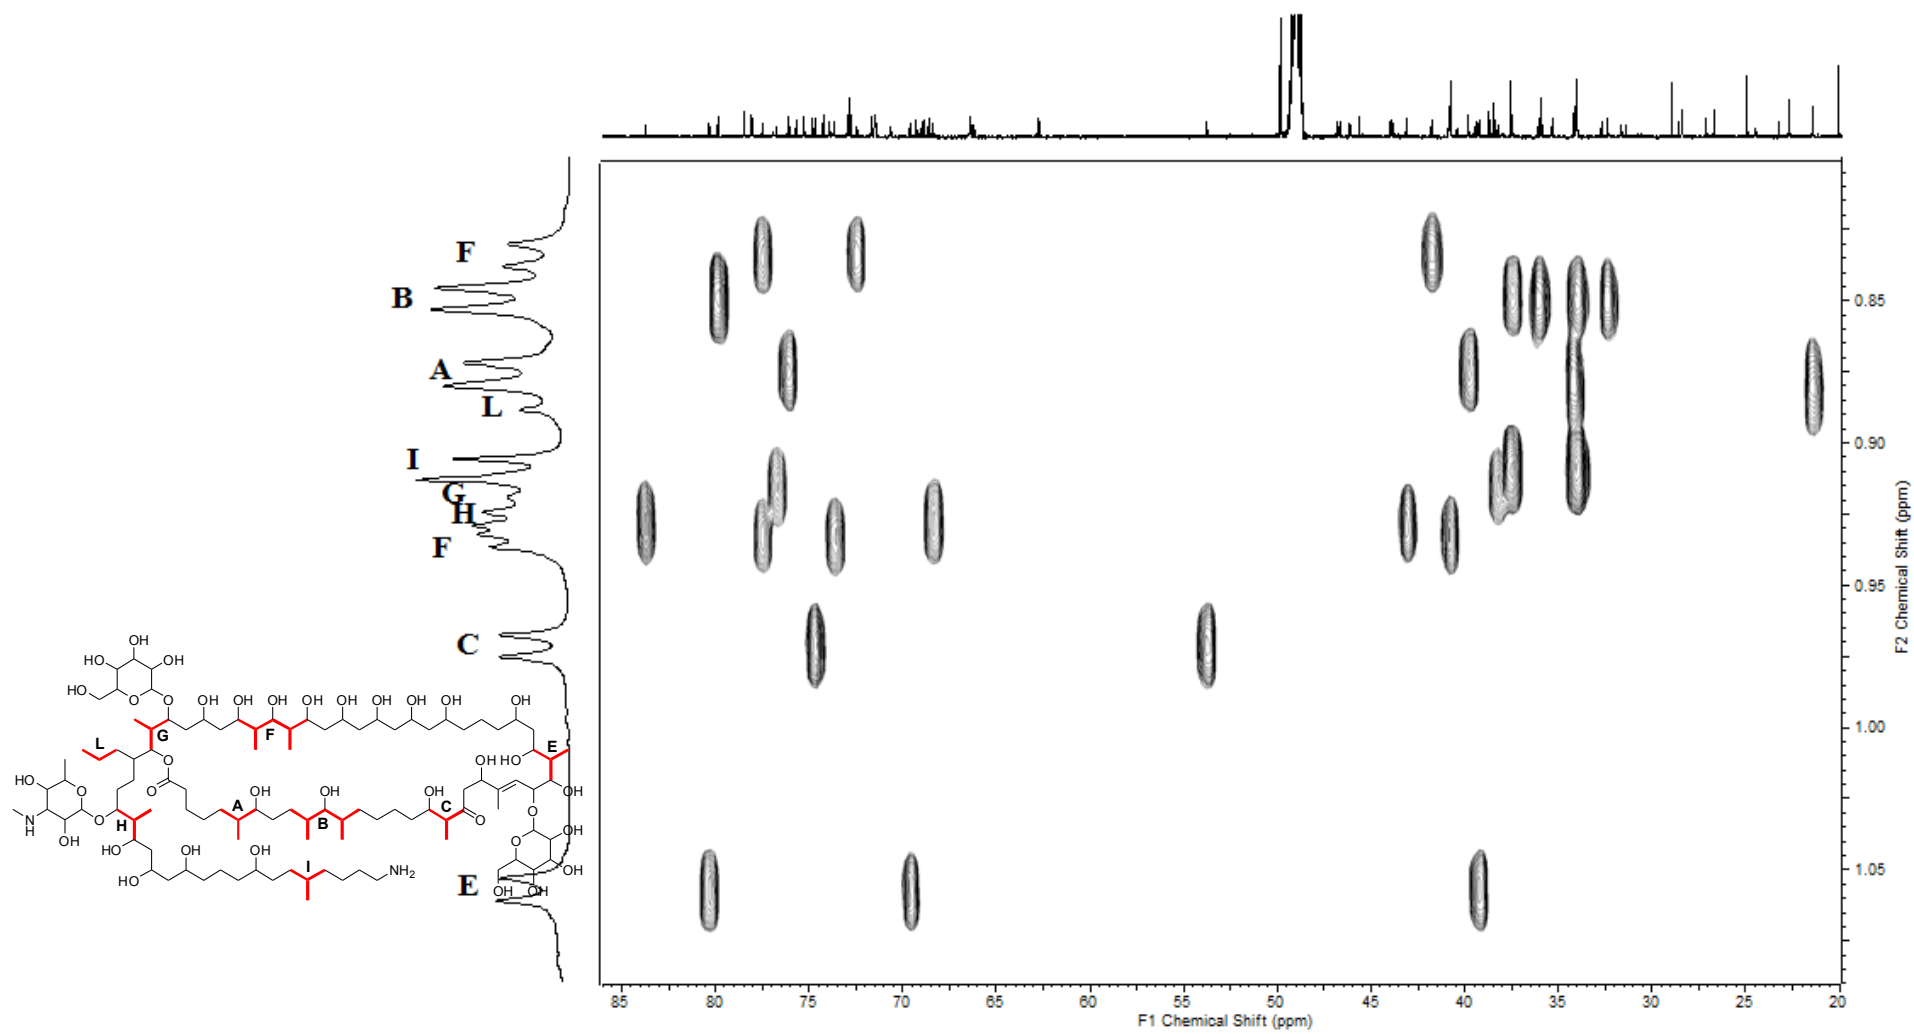

Figure S16. Expanded HMBC spectrum of gargantulide A (1) at 900 MHz

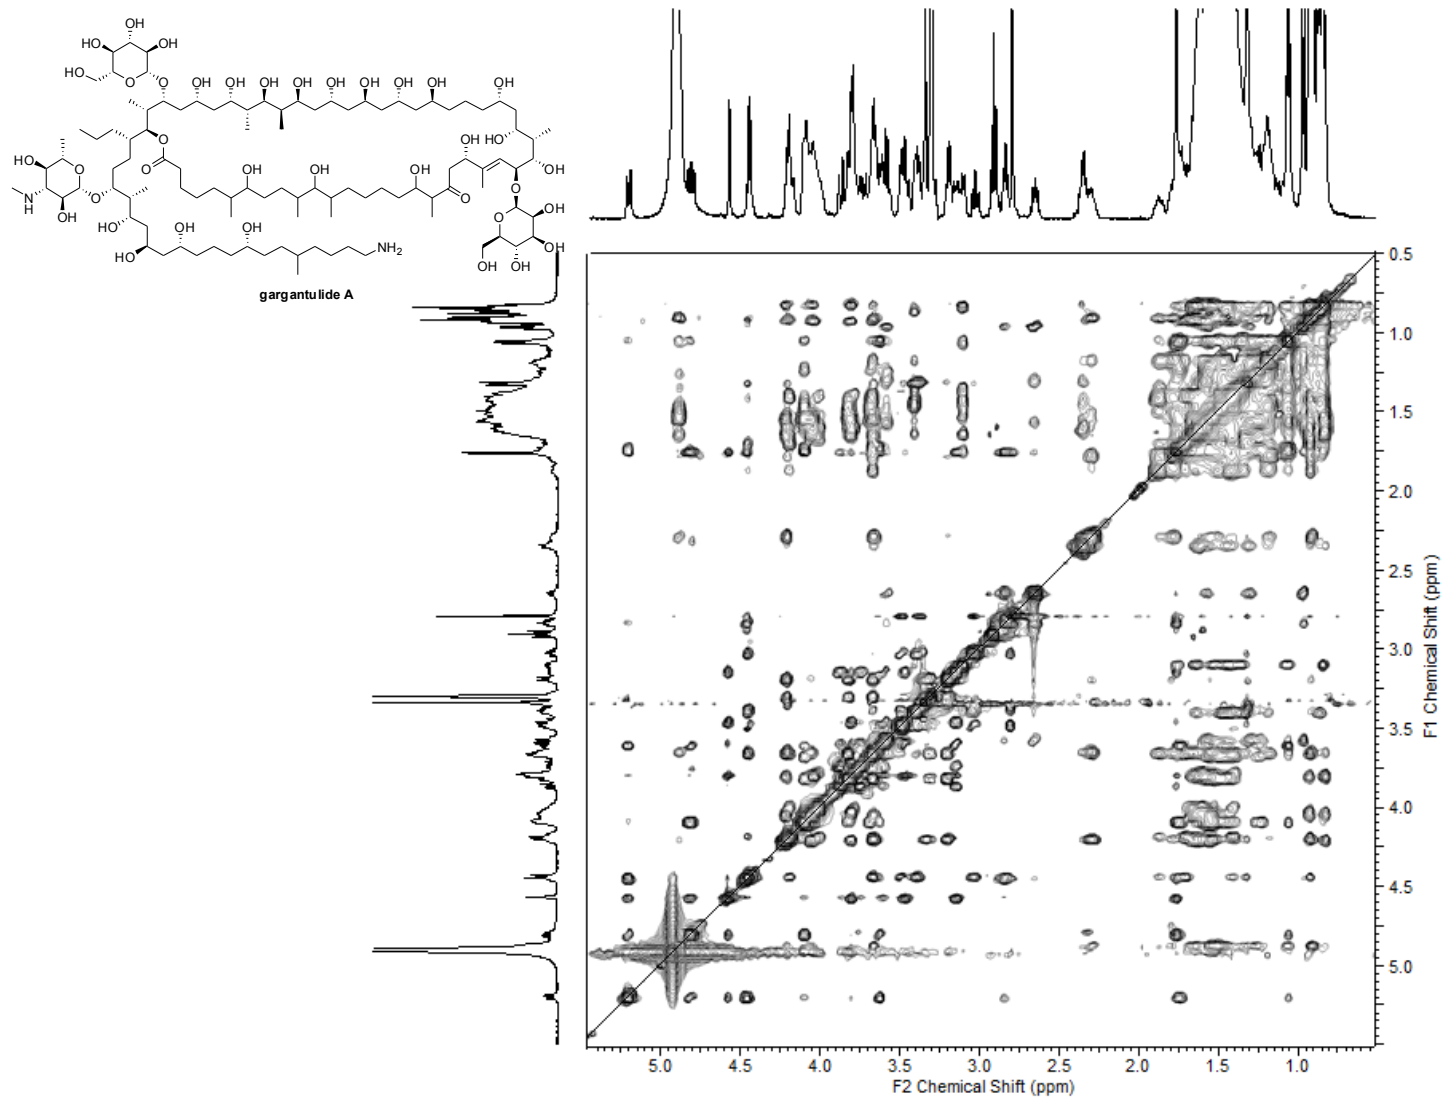

Figure S17. NOESY spectrum of gargantulide A (1) at 500 MHz.

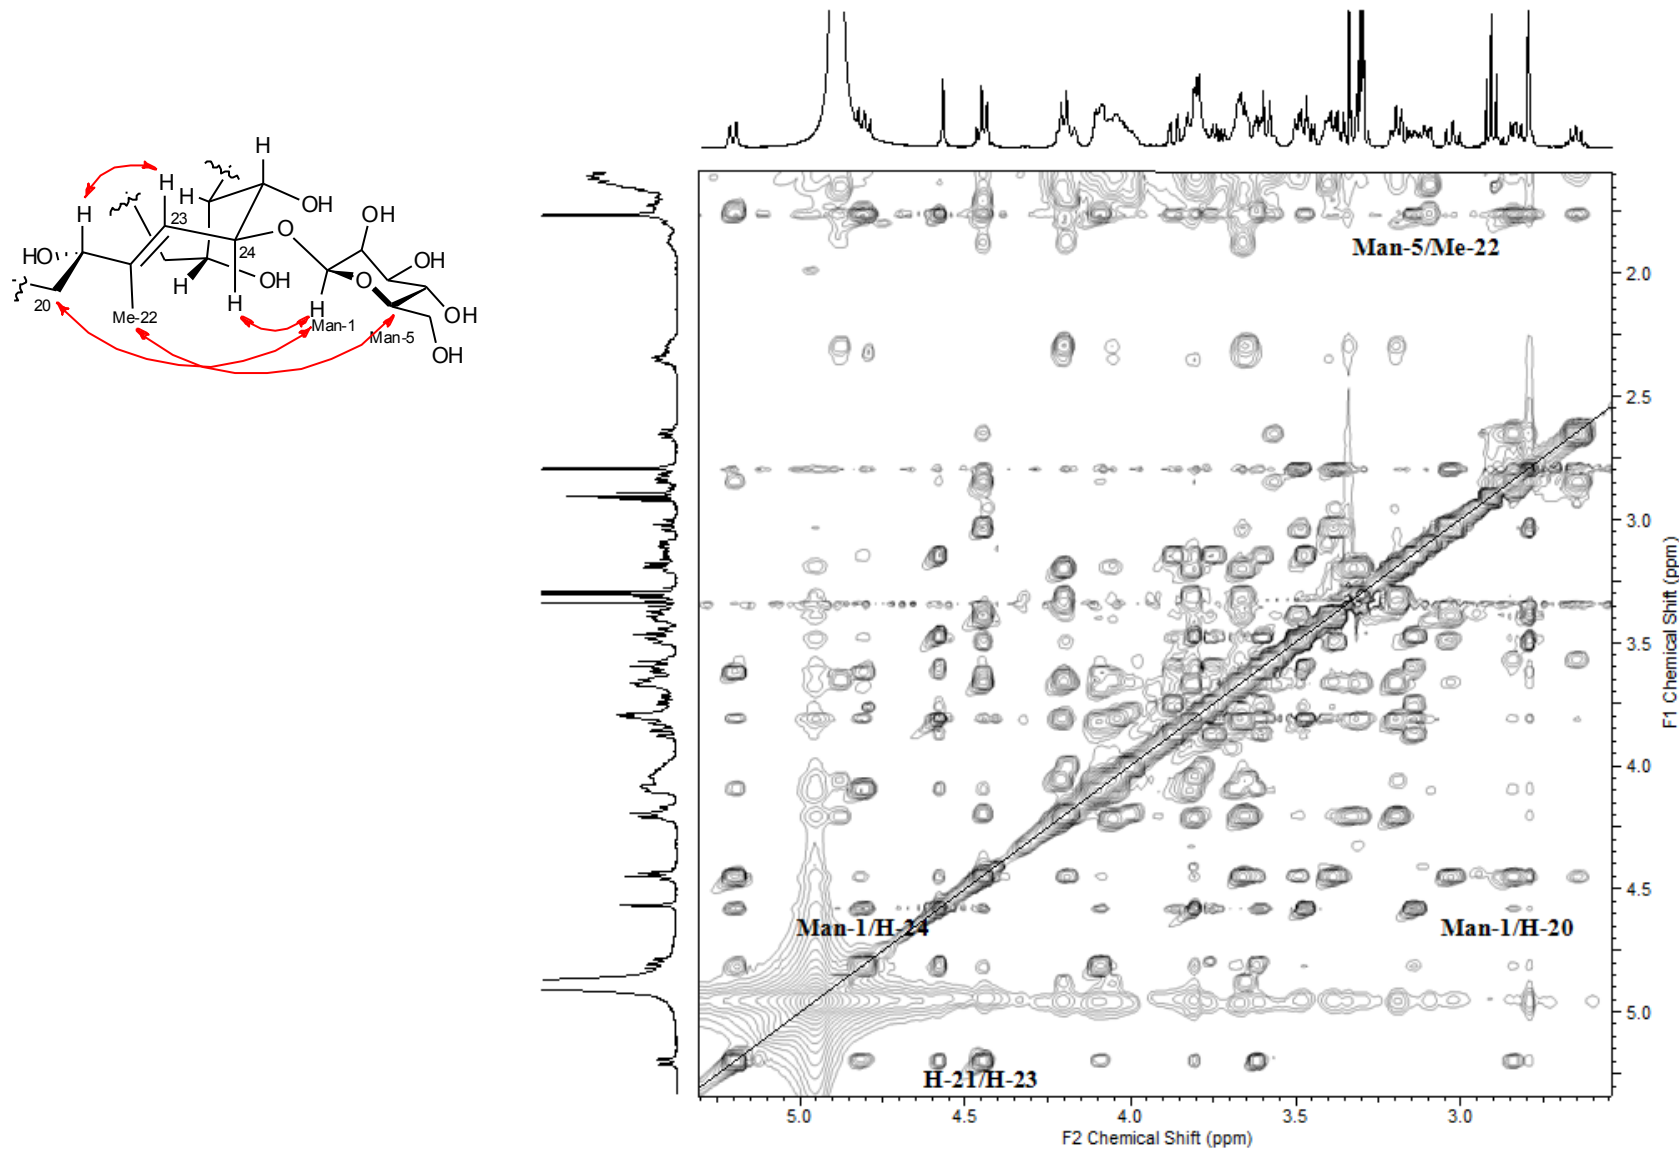

Figure S18. Expanded NOESY spectrum of gargantulide A (**1**) at 500 MHz.



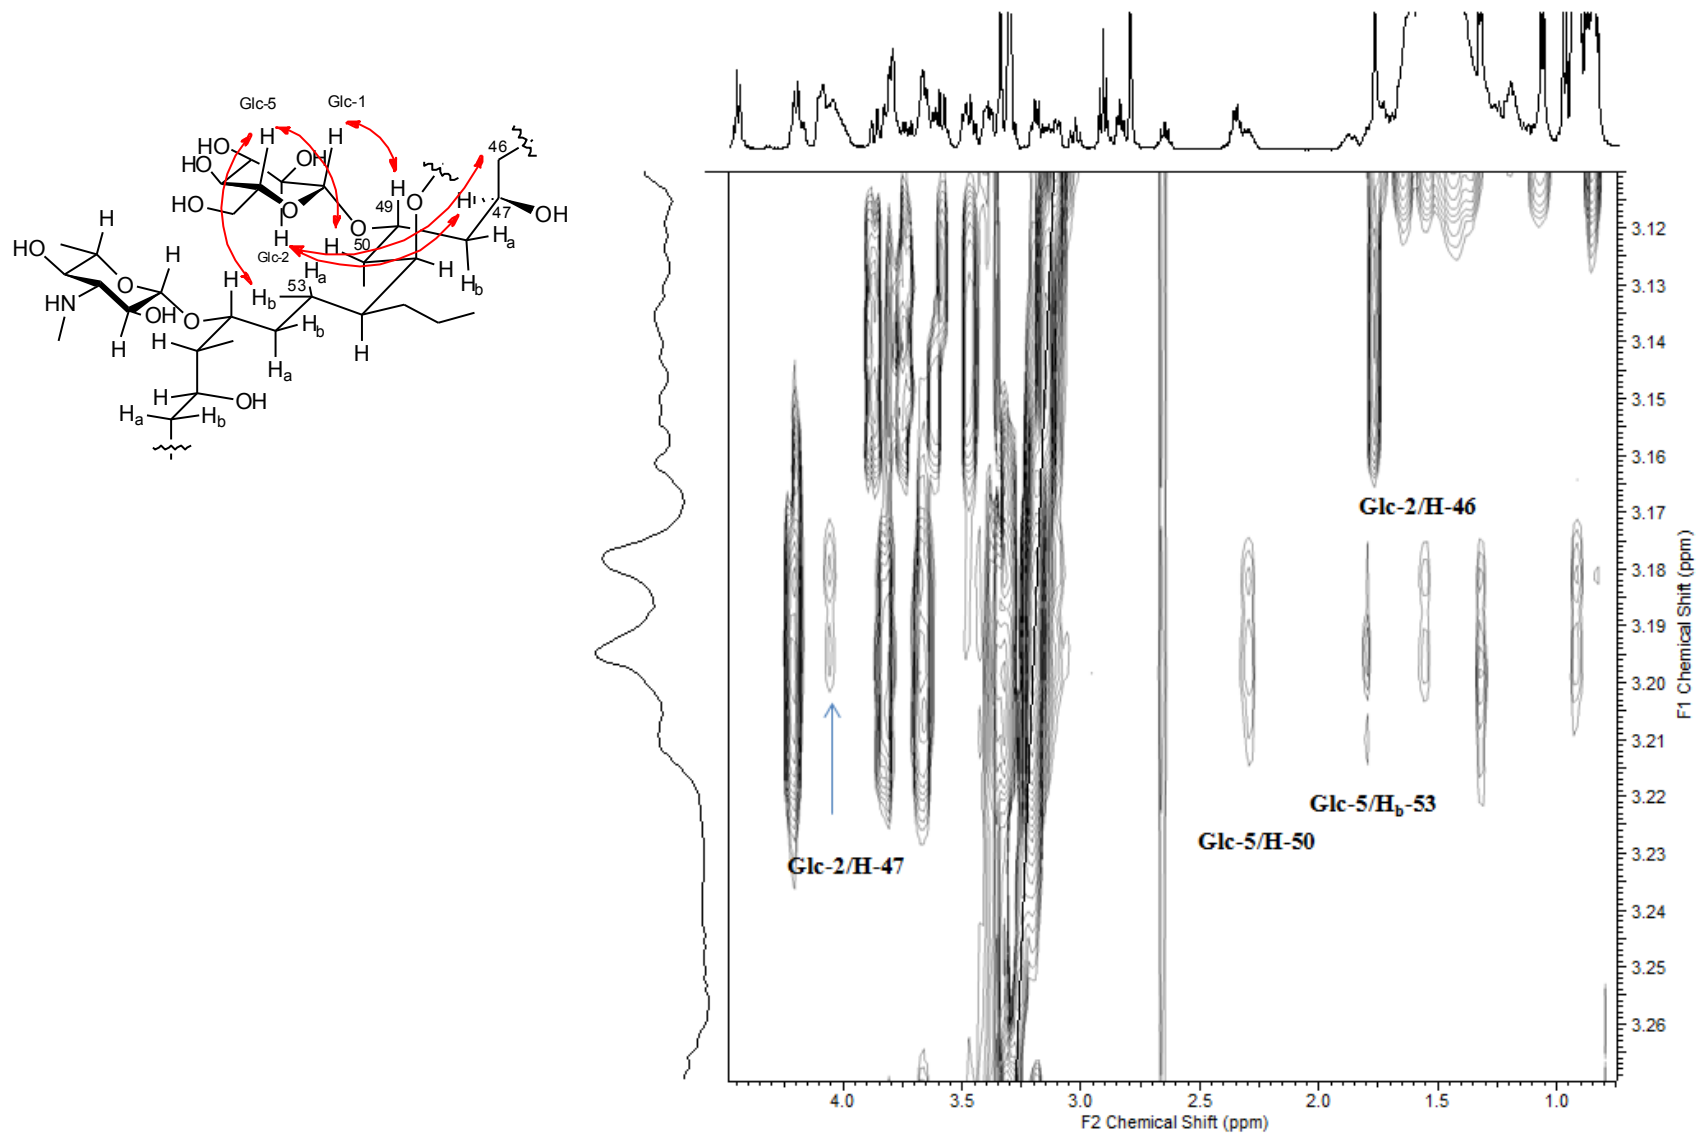

Figure S19. Expanded NOESY spectrum of gargantulide A (1) at 500 MHz.

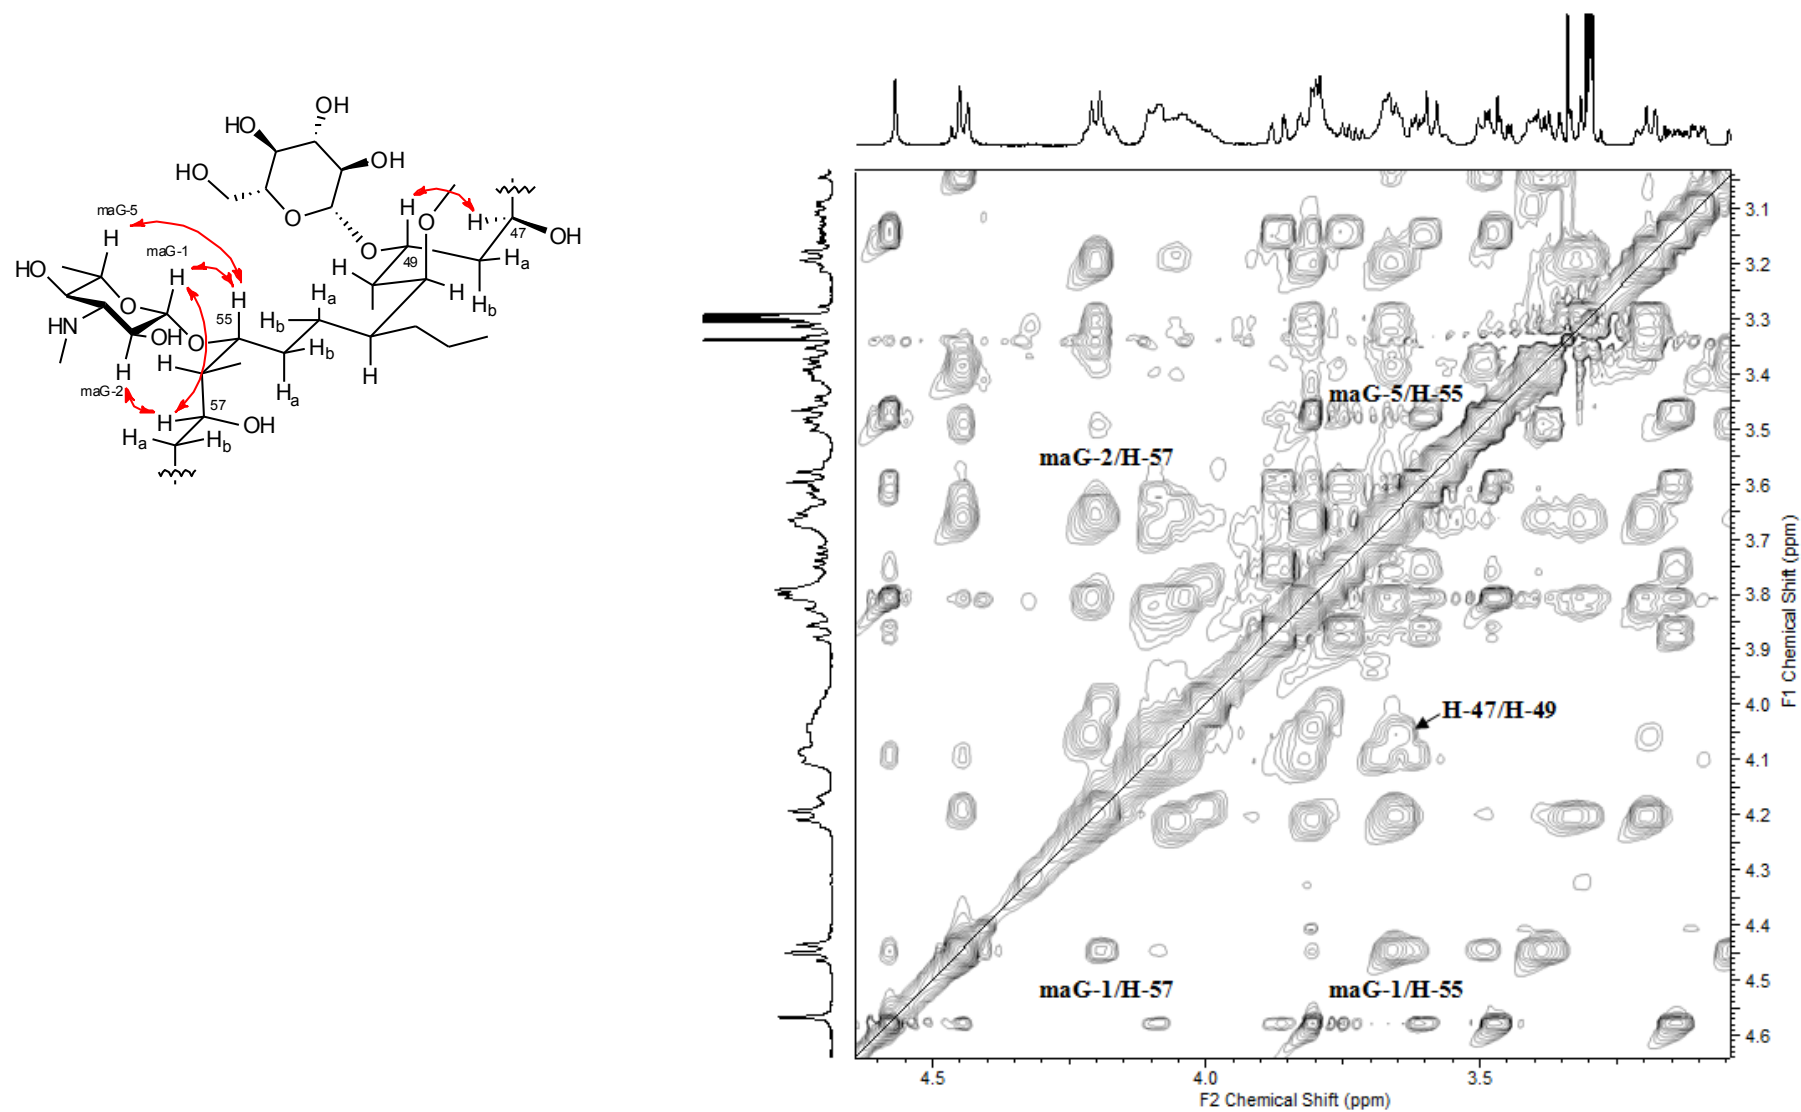

Figure S20. Expanded NOESY spectrum of gargantulide A (1) at 500 MHz.

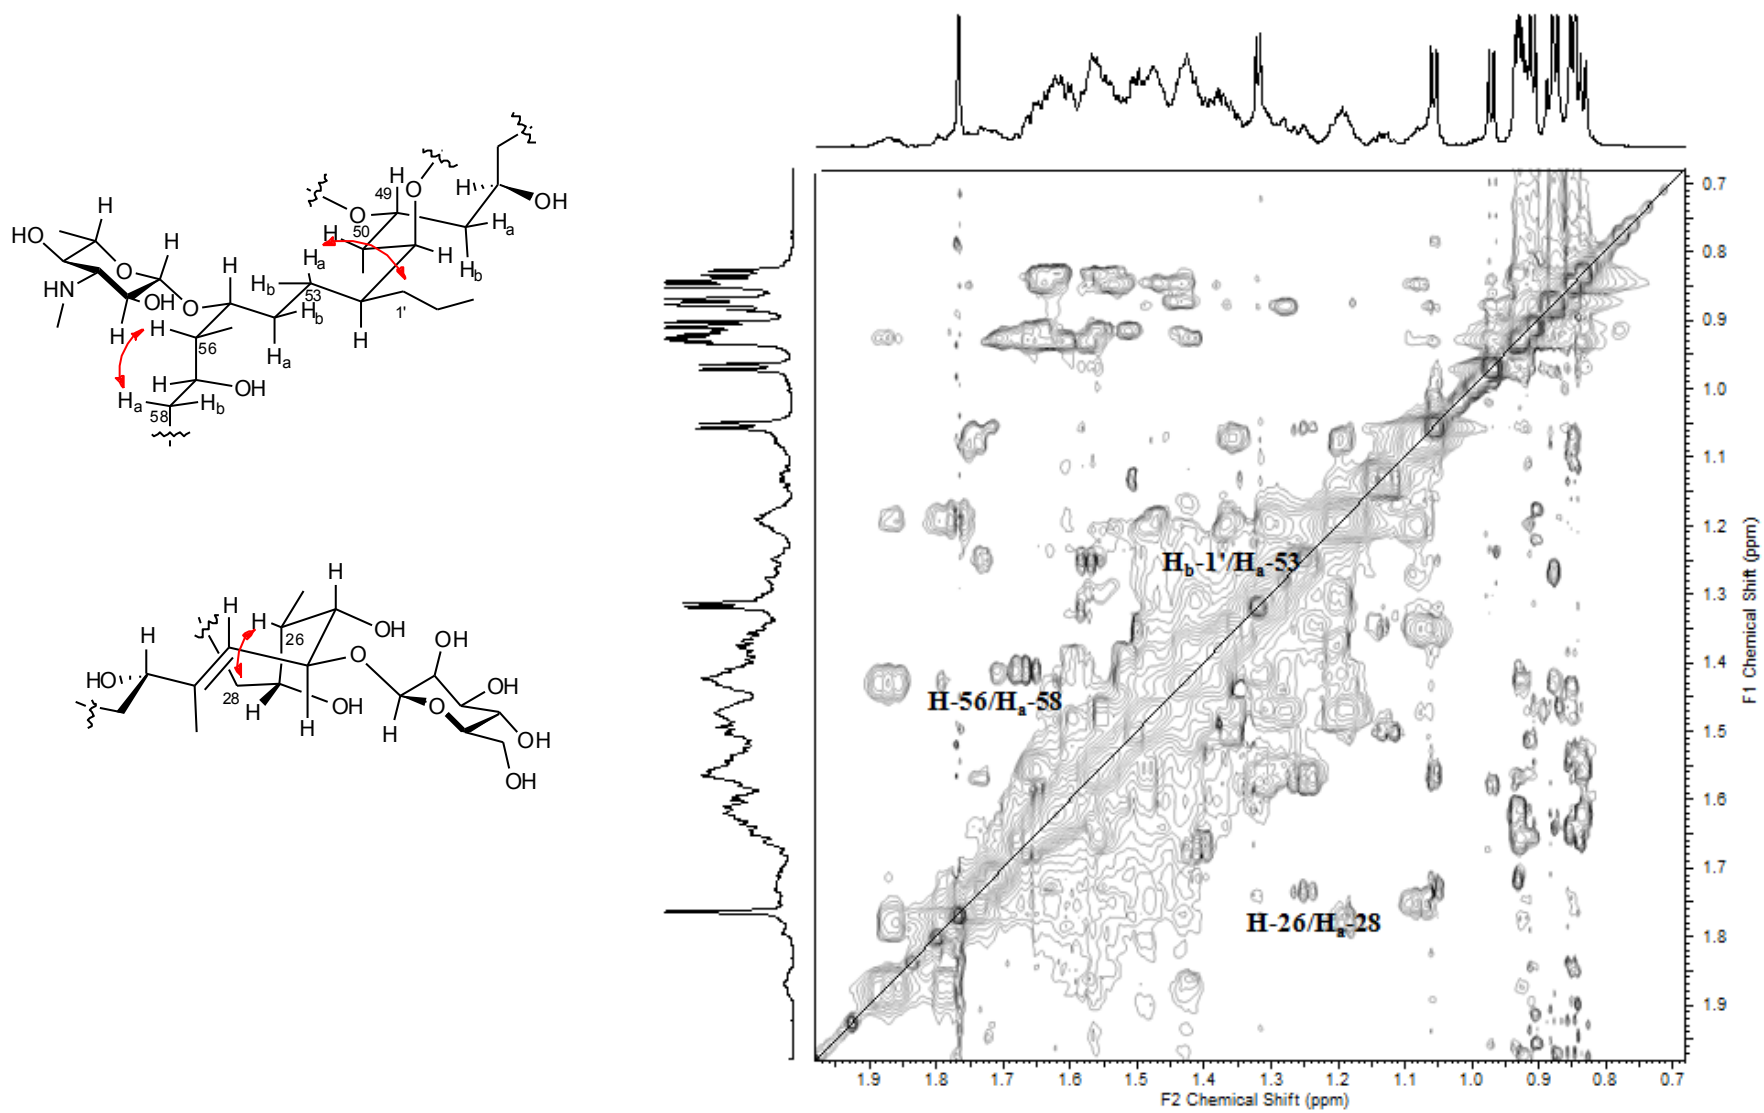

Figure S21. Expanded NOESY spectrum of gargantulide A (**1**) at 900 MHz.

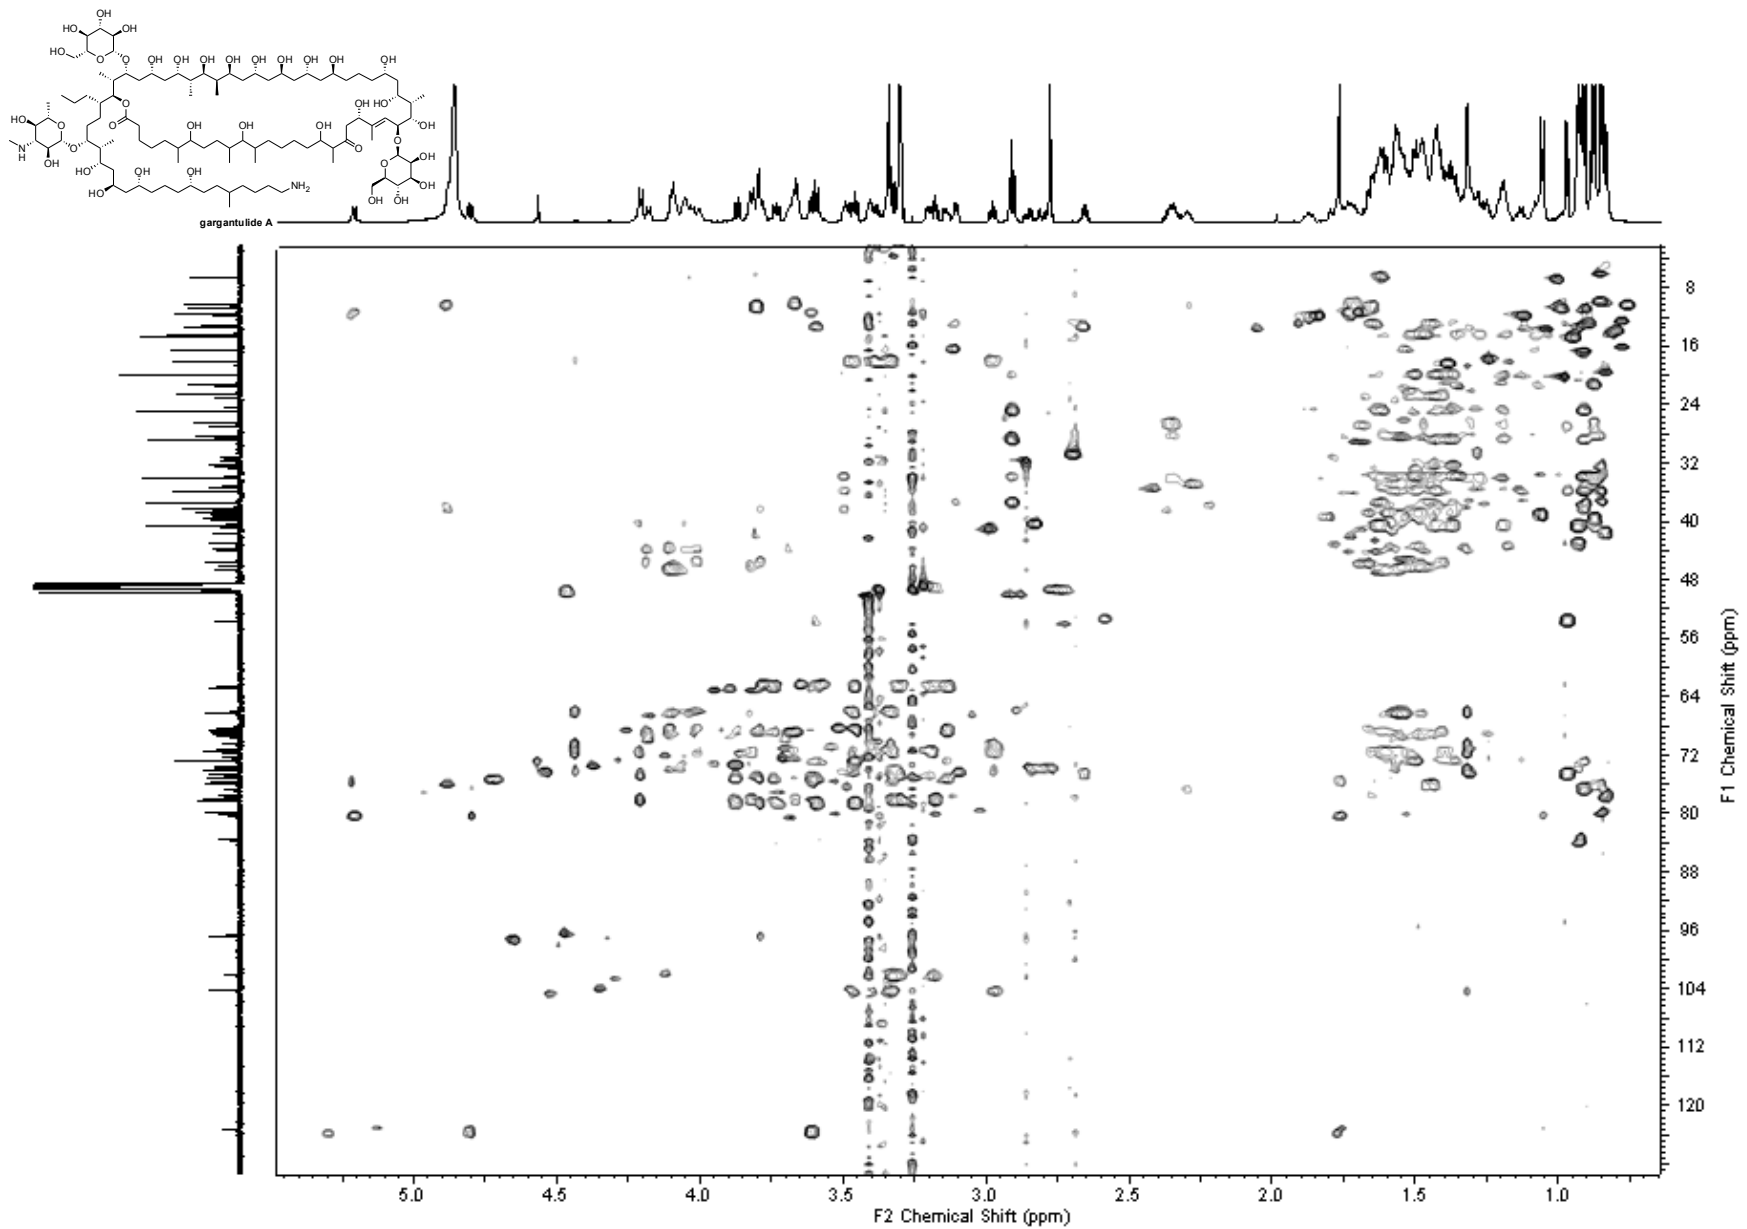

Figure S22. HECADE spectrum of gargantulide A (1) at 900 MHz.
